# Supplementary material for: Complexes trans-Pt(BODIPY)X(PEt3)2: excitation energy-dependent fluorescence and phosphorescence emissions, oxygen sensing and photocatalysis
Source: Royal Society of Chemistry journal article supplement (doi:10.1039/c6dt01623e), 2016-01-01
Supplement: c6dt01623e1.pdf [file c6dt01623e1.pdf]

# Complexes *trans*-Pt(BODIPY)X(PET<sub>3</sub>)<sub>2</sub>: Excitation Energy-Dependent Modulation of Fluorescence and Phosphorescence Emissions and Application to Oxygen Sensing and Photocatalysis

Peter Irmmler and Rainer F. Winter\*

Fachbereich Chemie der Universität Konstanz, Universitätsstraße 10, D-78464 Konstanz, Germany

## Supporting Information

### Table of Contents

|                                         |    |
|-----------------------------------------|----|
| NMR Spectra.....                        | 4  |
| Single Crystal X-ray Diffraction.....   | 14 |
| DFT and TD-DFT calculations.....        | 25 |
| Photophysical properties.....           | 36 |
| Stern-Volmer quenching experiments..... | 39 |
| Photoreaction.....                      | 40 |

### List of Figures

|                                                                                                                            |   |
|----------------------------------------------------------------------------------------------------------------------------|---|
| <b>Figure S1:</b> <sup>1</sup> H NMR spectrum of <b>Pt-Cl</b> in CD <sub>2</sub> Cl <sub>2</sub> .....                     | 4 |
| <b>Figure S2:</b> <sup>31</sup> P{ <sup>1</sup> H} NMR spectrum of <b>Pt-Cl</b> in CD <sub>2</sub> Cl <sub>2</sub> .....   | 4 |
| <b>Figure S3:</b> <sup>13</sup> C{ <sup>1</sup> H} NMR spectrum of <b>Pt-Cl</b> in CD <sub>2</sub> Cl <sub>2</sub> .....   | 5 |
| <b>Figure S4:</b> <sup>195</sup> Pt{ <sup>1</sup> H} NMR spectrum of <b>Pt-Cl</b> in CD <sub>2</sub> Cl <sub>2</sub> ..... | 5 |
| <b>Figure S5:</b> <sup>1</sup> H NMR spectrum of <b>Pt-Cl</b> in C <sub>6</sub> D <sub>6</sub> .....                       | 6 |
| <b>Figure S6:</b> <sup>31</sup> P{ <sup>1</sup> H} NMR spectrum of <b>Pt-Cl</b> in C <sub>6</sub> D <sub>6</sub> .....     | 6 |
| <b>Figure S7:</b> <sup>13</sup> C{ <sup>1</sup> H} NMR spectrum of <b>Pt-Cl</b> in C <sub>6</sub> D <sub>6</sub> .....     | 6 |
| <b>Figure S8:</b> <sup>1</sup> H NMR spectrum of <b>Pt-I</b> in C <sub>6</sub> D <sub>6</sub> .....                        | 7 |
| <b>Figure S9:</b> <sup>31</sup> P{ <sup>1</sup> H} NMR spectrum of <b>Pt-I</b> in C <sub>6</sub> D <sub>6</sub> .....      | 7 |
| <b>Figure S10:</b> <sup>13</sup> C{ <sup>1</sup> H} NMR spectrum of <b>Pt-I</b> in C <sub>6</sub> D <sub>6</sub> .....     | 8 |
| <b>Figure S11:</b> <sup>195</sup> Pt{ <sup>1</sup> H} NMR spectrum of <b>Pt-I</b> in C <sub>6</sub> D <sub>6</sub> .....   | 8 |
| <b>Figure S12:</b> <sup>1</sup> H NMR spectrum of <b>Pt-NCS</b> in C <sub>6</sub> D <sub>6</sub> .....                     | 9 |

|                                                                                                                                                                                                                                                                     |    |
|---------------------------------------------------------------------------------------------------------------------------------------------------------------------------------------------------------------------------------------------------------------------|----|
| <b>Figure S13:</b> $^{31}\text{P}\{^1\text{H}\}$ NMR spectrum of <b>Pt-NCS</b> in $\text{C}_6\text{D}_6$ .....                                                                                                                                                      | 9  |
| <b>Figure S14:</b> $^{13}\text{C}\{^1\text{H}\}$ NMR spectrum of <b>Pt-NCS</b> in $\text{C}_6\text{D}_6$ .....                                                                                                                                                      | 10 |
| <b>Figure S15:</b> $^{195}\text{Pt}\{^1\text{H}\}$ NMR spectrum of <b>Pt-NCS</b> in $\text{C}_6\text{D}_6$ .....                                                                                                                                                    | 10 |
| <b>Figure S16:</b> $^1\text{H}$ NMR spectrum of <b>Pt-NO<sub>2</sub></b> in $\text{C}_6\text{D}_6$ .....                                                                                                                                                            | 11 |
| <b>Figure S17:</b> $^{31}\text{P}\{^1\text{H}\}$ NMR spectrum of <b>Pt-NO<sub>2</sub></b> in $\text{C}_6\text{D}_6$ .....                                                                                                                                           | 11 |
| <b>Figure S18:</b> $^{13}\text{C}\{^1\text{H}\}$ NMR spectrum of <b>Pt-NO<sub>2</sub></b> in $\text{C}_6\text{D}_6$ .....                                                                                                                                           | 12 |
| <b>Figure S19:</b> $^{195}\text{Pt}\{^1\text{H}\}$ NMR spectrum of <b>Pt-NO<sub>2</sub></b> in $\text{C}_6\text{D}_6$ .....                                                                                                                                         | 12 |
| <b>Figure S20:</b> $^1\text{H}$ NMR spectrum of <b>Pt-CH<sub>3</sub></b> in $\text{C}_6\text{D}_6$ .....                                                                                                                                                            | 12 |
| <b>Figure S21:</b> $^{31}\text{P}\{^1\text{H}\}$ NMR spectrum of <b>Pt-CH<sub>3</sub></b> in $\text{C}_6\text{D}_6$ .....                                                                                                                                           | 13 |
| <b>Figure S22:</b> $^{13}\text{C}\{^1\text{H}\}$ NMR spectrum of <b>Pt-CH<sub>3</sub></b> in $\text{C}_6\text{D}_6$ .....                                                                                                                                           | 13 |
| <b>Figure S23:</b> $^{195}\text{Pt}\{^1\text{H}\}$ NMR spectrum of <b>Pt-CH<sub>3</sub></b> in $\text{C}_6\text{D}_6$ .....                                                                                                                                         | 13 |
| <b>Figure S24:</b> Packing of molecules of <b>Pt-Cl</b> along the crystallographic <i>a</i> (a), <i>b</i> (b), and <i>c</i> axis (c).....                                                                                                                           | 16 |
| <b>Figure S25:</b> Packing of molecules of <b>Pt-I</b> along the crystallographic <i>a</i> (a), <i>b</i> (b), and <i>c</i> axis (c).<br>.....                                                                                                                       | 18 |
| <b>Figure S26:</b> Packing of molecules of <b>Pt-NCS</b> along the crystallographic <i>a</i> (a), <i>b</i> (b), and <i>c</i> axis (c).....                                                                                                                          | 20 |
| <b>Figure S27:</b> Packing of molecules of <b>Pt-NO<sub>2</sub></b> along the crystallographic <i>a</i> (a), <i>b</i> (b), and <i>c</i> axis (c).....                                                                                                               | 22 |
| <b>Figure S28:</b> Packing of molecules of <b>Pt-CH<sub>3</sub></b> along the crystallographic <i>a</i> (a), <i>b</i> (b), and <i>c</i> axis (c).....                                                                                                               | 24 |
| <b>Figure S29:</b> UV-Vis absorption (black), excitation (detection at 635 nm, red) and emission spectra (orange, excited at 450 nm) of <b>Pt-Cl</b> in a ca. $10^{-6}$ M $\text{CH}_2\text{Cl}_2$ solution at r.t.....                                             | 36 |
| <b>Figure S30:</b> UV-Vis absorption (black), excitation (detection at 635 nm, r.t., red) and emission spectra (orange, r.t., excited at 468 nm; violet, 77 K, excited at 450 nm) of <b>Pt-Cl</b> in a ca. $10^{-6}$ M toluene solution.....                        | 36 |
| <b>Figure S31:</b> UV-Vis absorption (black), excitation (detection at 640 nm, red) and emission spectra (orange, excited at 471 nm) of <b>Pt-I</b> in a ca. $10^{-6}$ M $\text{CH}_2\text{Cl}_2$ solution at r.t.....                                              | 37 |
| <b>Figure S32:</b> UV-Vis absorption (black), excitation (detection at 646 nm, red) and emission spectra (orange, excited at 450 nm) of <b>Pt-NO<sub>2</sub></b> in a ca. $10^{-6}$ M $\text{CH}_2\text{Cl}_2$ solution at r.t.....                                 | 37 |
| <b>Figure S33:</b> UV-Vis absorption (black), excitation (detection at 638 nm, red) and emission spectra (orange, excited at 450 nm) of <b>Pt-NCS</b> in a ca. $10^{-6}$ M $\text{CH}_2\text{Cl}_2$ solution at r.t.....                                            | 38 |
| <b>Figure S34:</b> Electronical absorption spectra of <b>Pt-CH<sub>3</sub></b> in a ca. $10^{-6}$ M benzene solution before and after irradiating the sample into its lowest energy absorption band, and of <b>Br-BODIPY</b> in benzene solution, respectively..... | 38 |
| <b>Figure S35:</b> Stacked luminescence spectra of <b>Pt-Cl</b> at different oxygen concentrations. ....                                                                                                                                                            | 39 |

|                                                                                                                                                                                 |    |
|---------------------------------------------------------------------------------------------------------------------------------------------------------------------------------|----|
| <b>Figure S36:</b> Stern-Volmer plot of <b>Pt-Cl</b> .....                                                                                                                      | 39 |
| <b>Figure S37:</b> Stacked luminescence spectra of <b>Pt-NO<sub>2</sub></b> in CH <sub>2</sub> Cl <sub>2</sub> solution at different oxygen concentration levels.....           | 40 |
| <b>Figure S38:</b> Spectral change in the absorption spectra of the reaction mixture containing <b>DHN</b> and <b>Pt-I</b> .....                                                | 40 |
| <b>Figure S39:</b> Spectral change in the absorption spectra of the reaction mixture containing <b>DHN</b> and the reference sensitizer <b>MB</b> .....                         | 41 |
| <b>Figure S40:</b> Sample of the reaction mixture of <b>DHN</b> and <b>Pt-Cl</b> kept in the dark for 180 min; UV-Vis spectra were taken before and after that time period..... | 41 |
| <b>Figure S41:</b> Sample of the reaction mixture of <b>DHN</b> and <b>Pt-I</b> kept in the dark for 180 min; UV-Vis spectra were taken before and after that time period.....  | 42 |

## List of Tables

|                                                                                                                                                                                                                                                    |    |
|----------------------------------------------------------------------------------------------------------------------------------------------------------------------------------------------------------------------------------------------------|----|
| <b>Table S1:</b> Crystal and refinement data for <b>Pt-Cl</b> , <b>Pt-I</b> , <b>Pt-NCS</b> , <b>Pt-NO<sub>2</sub></b> and <b>Pt-CH<sub>3</sub></b> .....                                                                                          | 14 |
| <b>Table S2:</b> Bond lengths [Å] and angles [°] for <b>Pt-Cl</b> .....                                                                                                                                                                            | 15 |
| <b>Table S3:</b> Bond lengths [Å] and angles [°] for <b>Pt-I</b> .....                                                                                                                                                                             | 17 |
| <b>Table S4:</b> Bond lengths [Å] and angles [°] for <b>Pt-NCS</b> .....                                                                                                                                                                           | 19 |
| <b>Table S5:</b> Bond lengths [Å] and angles [°] for <b>Pt-NO<sub>2</sub></b> .....                                                                                                                                                                | 21 |
| <b>Table S6:</b> Bond lengths [Å] and angles [°] for <b>Pt-CH<sub>3</sub></b> .....                                                                                                                                                                | 23 |
| <b>Table S7:</b> Atomic coordinates of <b>Pt-Cl</b> in the optimized ground state geometry.....                                                                                                                                                    | 25 |
| <b>Table S8:</b> Atomic coordinates of <b>Pt-Cl</b> in the optimized geometry of the first excited triplet state.....                                                                                                                              | 26 |
| <b>Table S9:</b> Atomic coordinates of <b>Pt-I</b> in the optimized ground state geometry.....                                                                                                                                                     | 27 |
| <b>Table S10:</b> Atomic coordinates of <b>Pt-I</b> in the optimized geometry of the first excited triplet state.....                                                                                                                              | 28 |
| <b>Table S11:</b> Atomic coordinates of <b>Pt-NCS</b> in the optimized ground state geometry.....                                                                                                                                                  | 29 |
| <b>Table S12:</b> Atomic coordinates of <b>Pt-NCS</b> in the optimized geometry of the first excited triplet state.....                                                                                                                            | 30 |
| <b>Table S13:</b> Atomic coordinates of <b>Pt-NO<sub>2</sub></b> in the optimized ground state geometry.....                                                                                                                                       | 31 |
| <b>Table S14:</b> Atomic coordinates of <b>Pt-NO<sub>2</sub></b> in the optimized geometry of the first excited triplet state.....                                                                                                                 | 33 |
| <b>Table S15:</b> Selected bond lengths and bond angles of the calculated structures of <b>Pt-Cl</b> , <b>Pt-I</b> , <b>Pt-NCS</b> , and <b>Pt-NO<sub>2</sub></b> in comparison with the structure data from X-ray crystal structure analysis..... | 35 |

## NMR Spectra

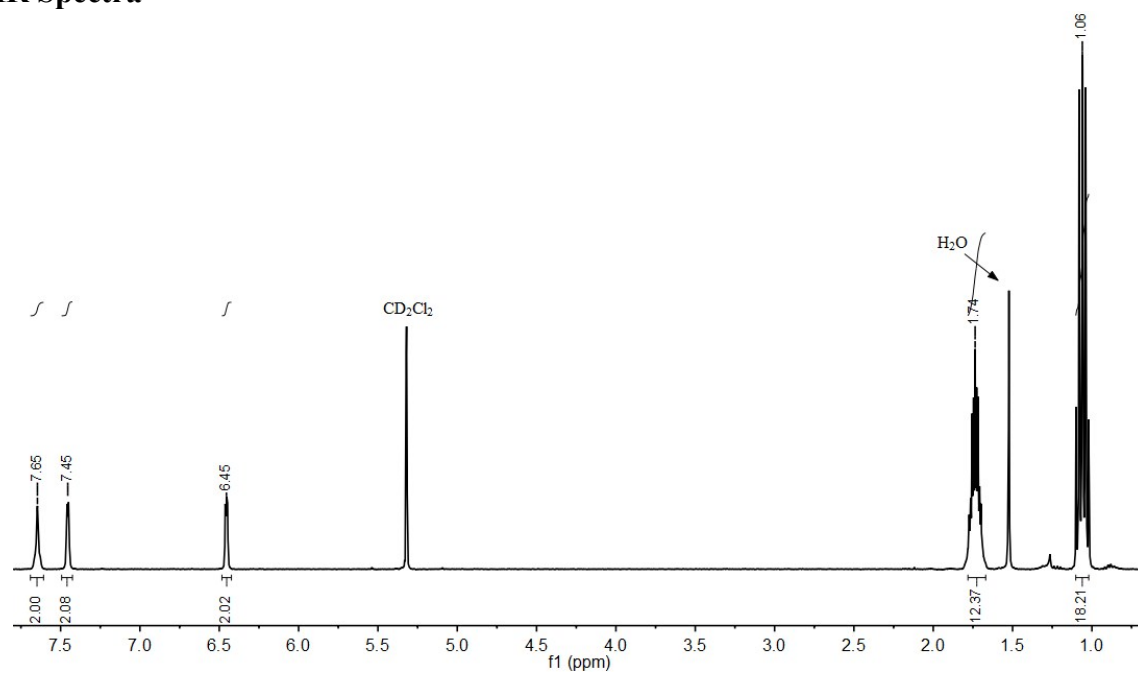

**Figure S1:**  $^1\text{H}$  NMR spectrum of Pt-Cl in  $\text{CD}_2\text{Cl}_2$ .

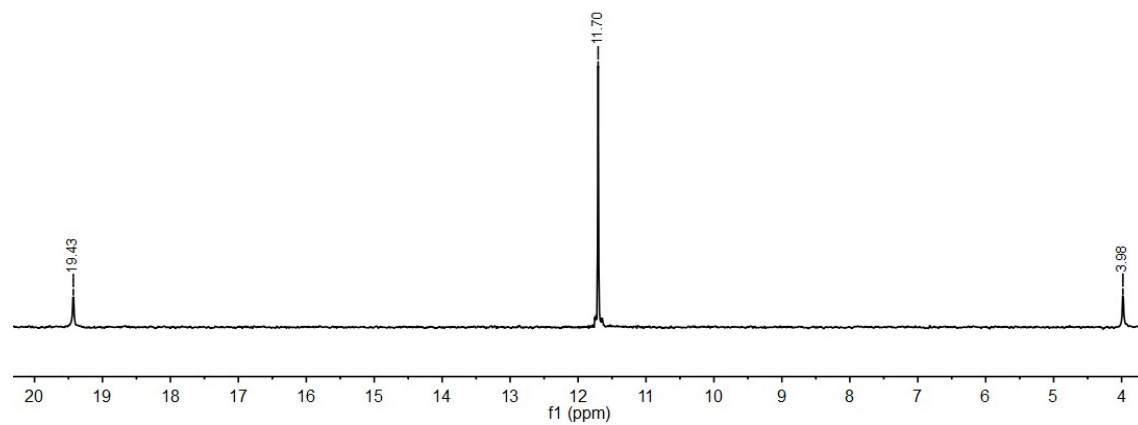

**Figure S2:**  $^{31}\text{P}\{^1\text{H}\}$  NMR spectrum of Pt-Cl in  $\text{CD}_2\text{Cl}_2$ .

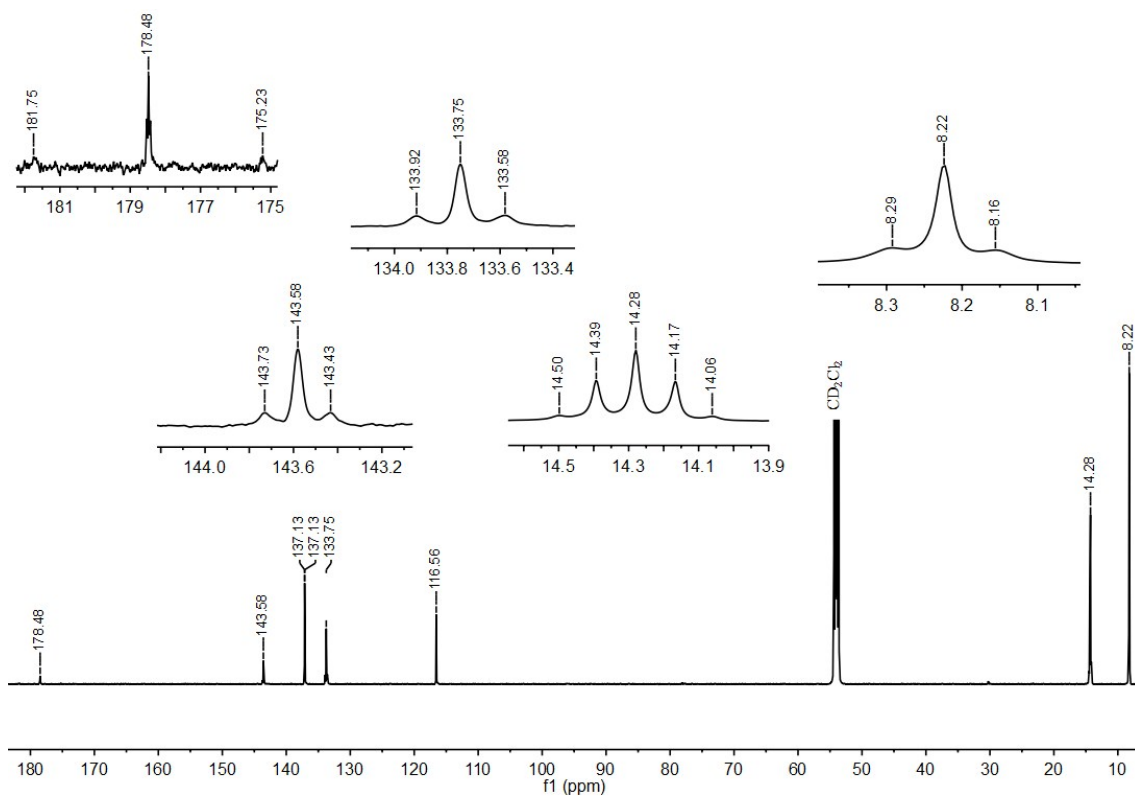

**Figure S3:**  $^{13}\text{C}\{^1\text{H}\}$  NMR spectrum of Pt-Cl in  $\text{CD}_2\text{Cl}_2$ .

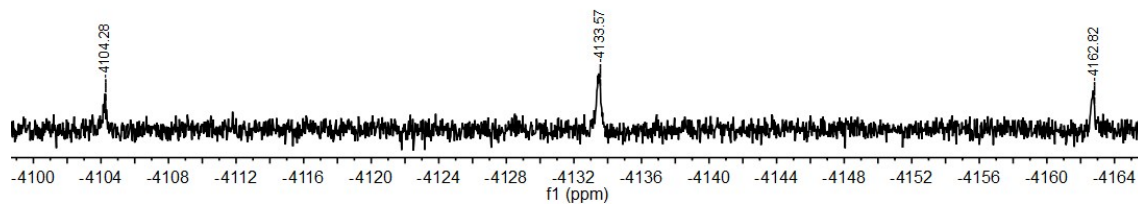

**Figure S4:**  $^{195}\text{Pt}\{^1\text{H}\}$  NMR spectrum of Pt-Cl in  $\text{CD}_2\text{Cl}_2$ .

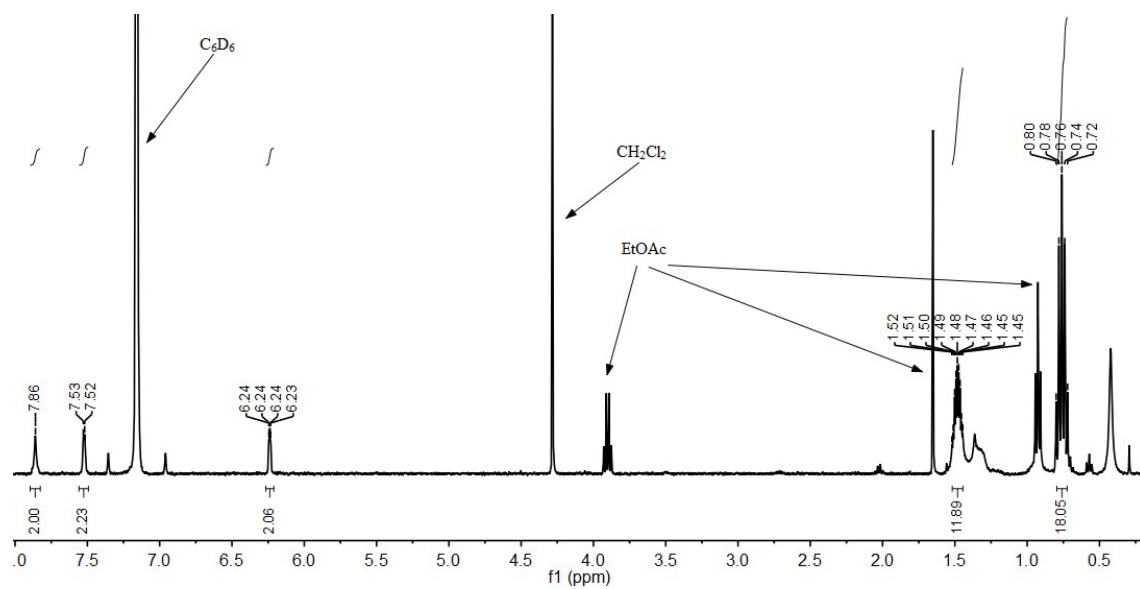

Figure S5:  $^1\text{H}$  NMR spectrum of Pt-Cl in  $\text{C}_6\text{D}_6$ .

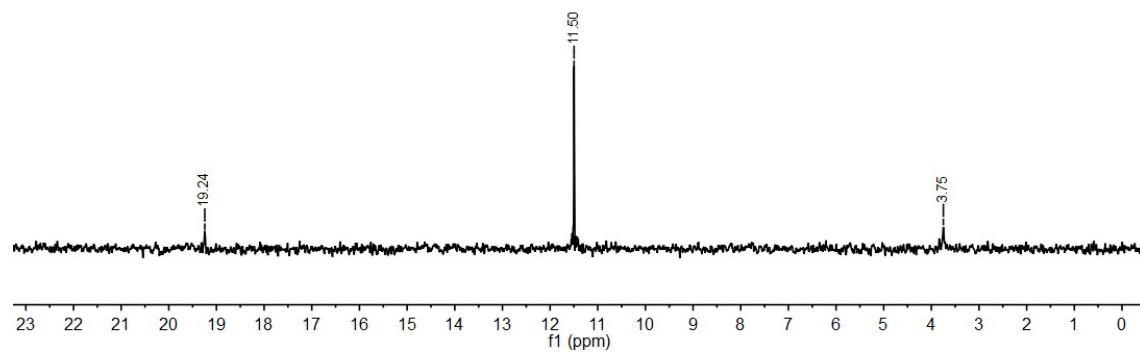

Figure S6:  $^{31}\text{P}\{^1\text{H}\}$  NMR spectrum of Pt-Cl in  $\text{C}_6\text{D}_6$ .

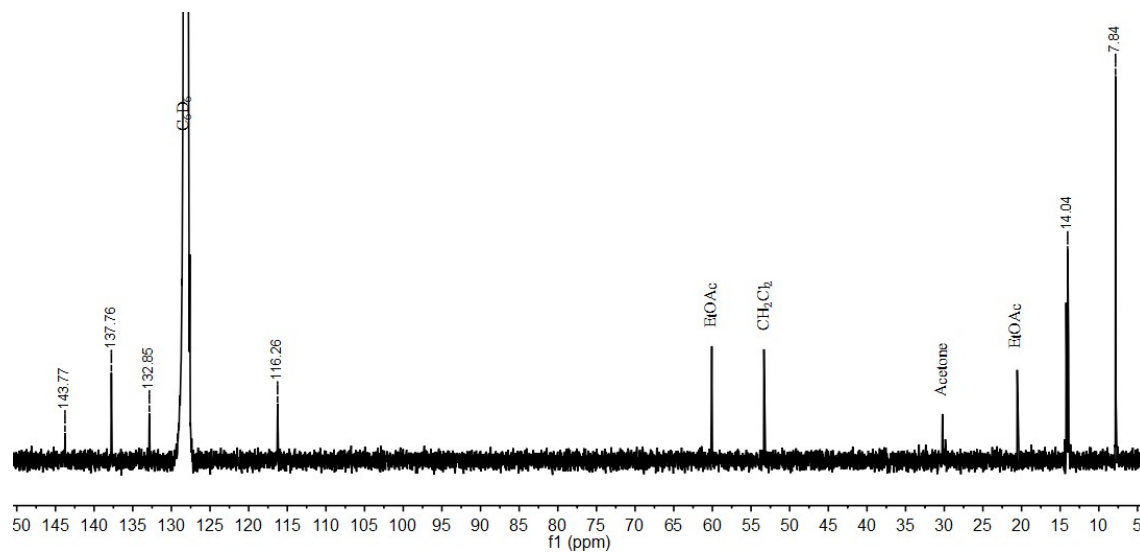

Figure S7:  $^{13}\text{C}\{^1\text{H}\}$  NMR spectrum of Pt-Cl in  $\text{C}_6\text{D}_6$ .

**Pt-Cl:**  $^1\text{H}$  NMR (600 MHz,  $\text{C}_6\text{D}_6$ ):  $\delta$  7.86 (br s, 2H, H5, H9), 7.52 (d, 2H,  $^3J_{\text{HH}} = 3.56$  Hz, H3, H7), 6.24 (dd, 2H,  $^3J_{\text{HH}} = 3.56$  Hz,  $^3J_{\text{HH}} = 1.56$  Hz, H3, H8), 1.48 (m, 12H, P- $\text{CH}_2$ -), 0.76 (m, 18H, P- $\text{CH}_2$ - $\text{CH}_3$ ).  $^{31}\text{P}$  NMR (161.9 MHz,  $\text{C}_6\text{D}_6$ ):  $\delta$  11.50 ppm (s, with satellites  $J_{\text{P}^1\text{H}} = 2508$  Hz).  $^{13}\text{C}$  NMR (150.9 MHz,  $\text{C}_6\text{D}_6$ ):  $\delta$  143.77 (s, C2, C6), 137.76 (s, C5, C9), 132.85 (s, C3, C7), 116.26 (s, C3, C7), 14.04 (t,  $J_{\text{PC}} = 17.1$  Hz, P- $\text{CH}_2$ -), 7.84 (br s, P- $\text{CH}_2$ - $\text{CH}_3$ ), C1 was not detected due to a low signal to noise ratio.

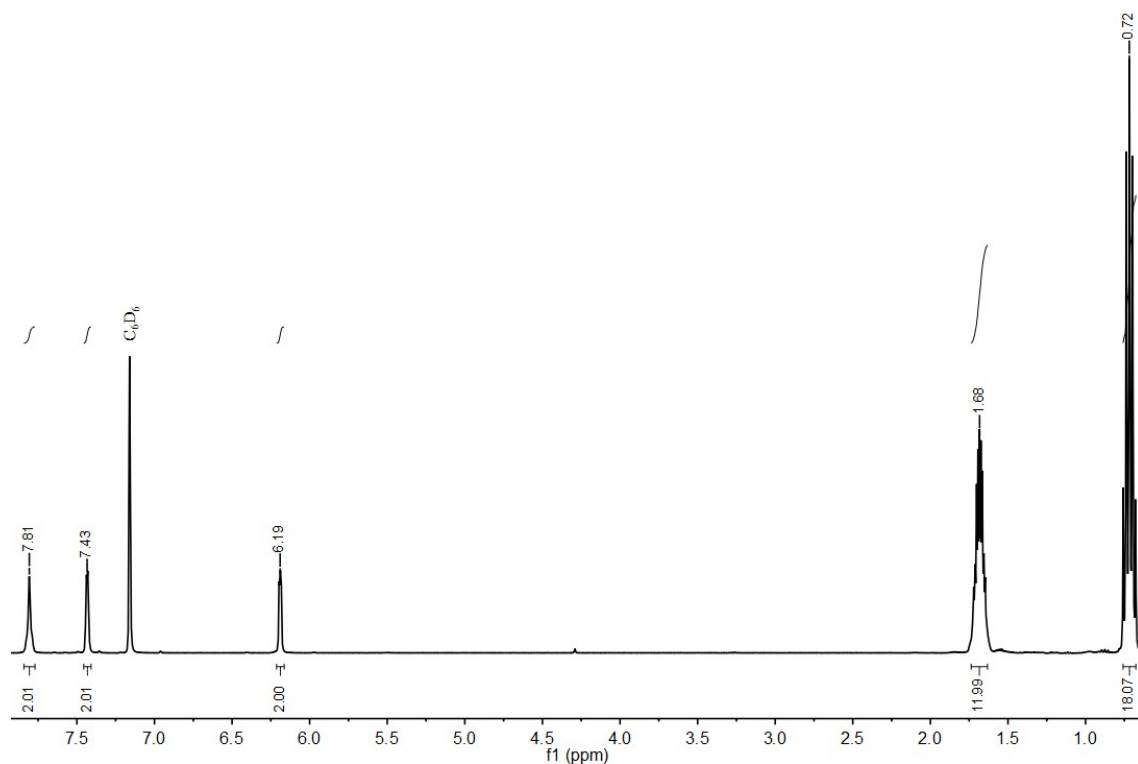

**Figure S8:**  $^1\text{H}$  NMR spectrum of **Pt-I** in  $\text{C}_6\text{D}_6$ .

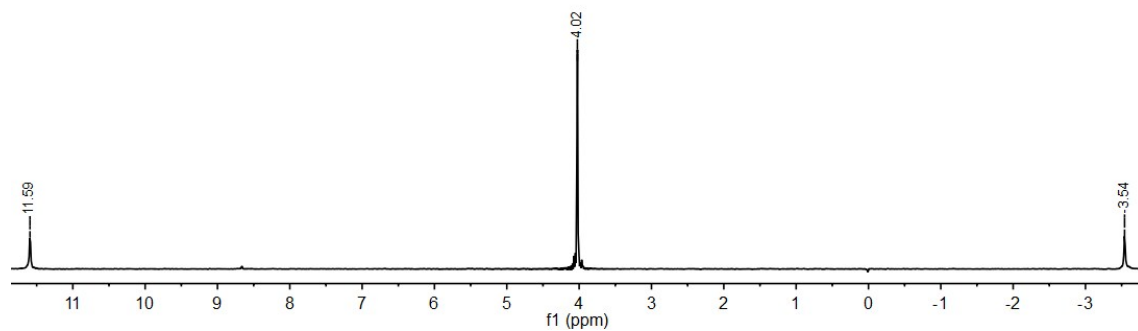

**Figure S9:**  $^{31}\text{P}\{^1\text{H}\}$  NMR spectrum of **Pt-I** in  $\text{C}_6\text{D}_6$ .

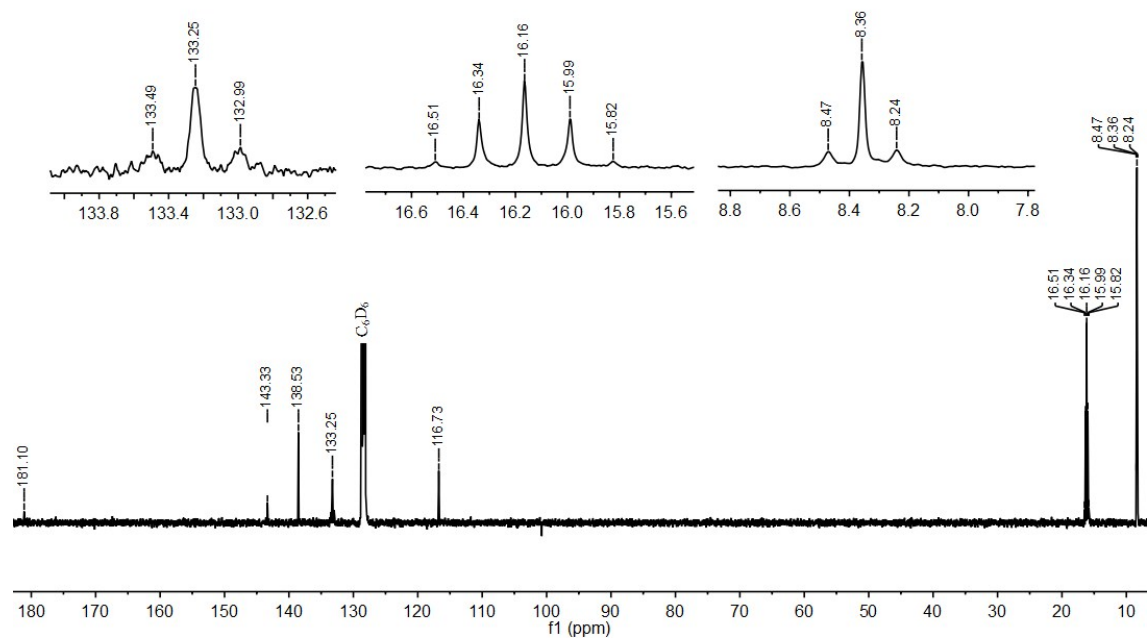

**Figure S10:**  $^{13}\text{C}\{^1\text{H}\}$  NMR spectrum of **Pt-I** in  $\text{C}_6\text{D}_6$ .

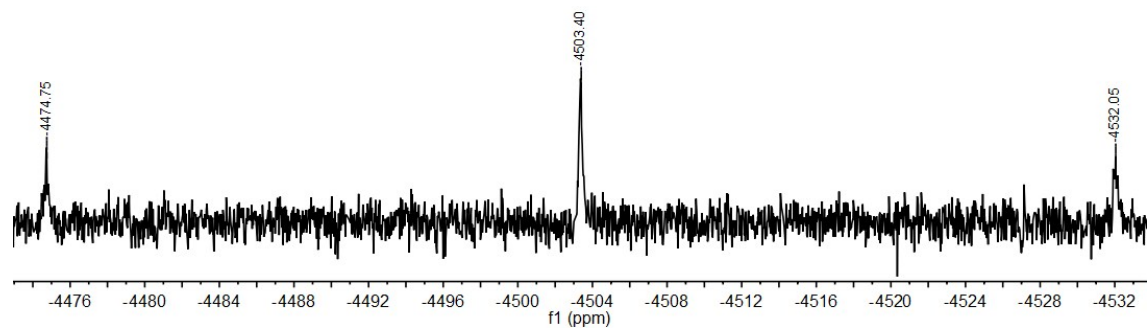

**Figure S11:**  $^{195}\text{Pt}\{^1\text{H}\}$  NMR spectrum of **Pt-I** in  $\text{C}_6\text{D}_6$ .



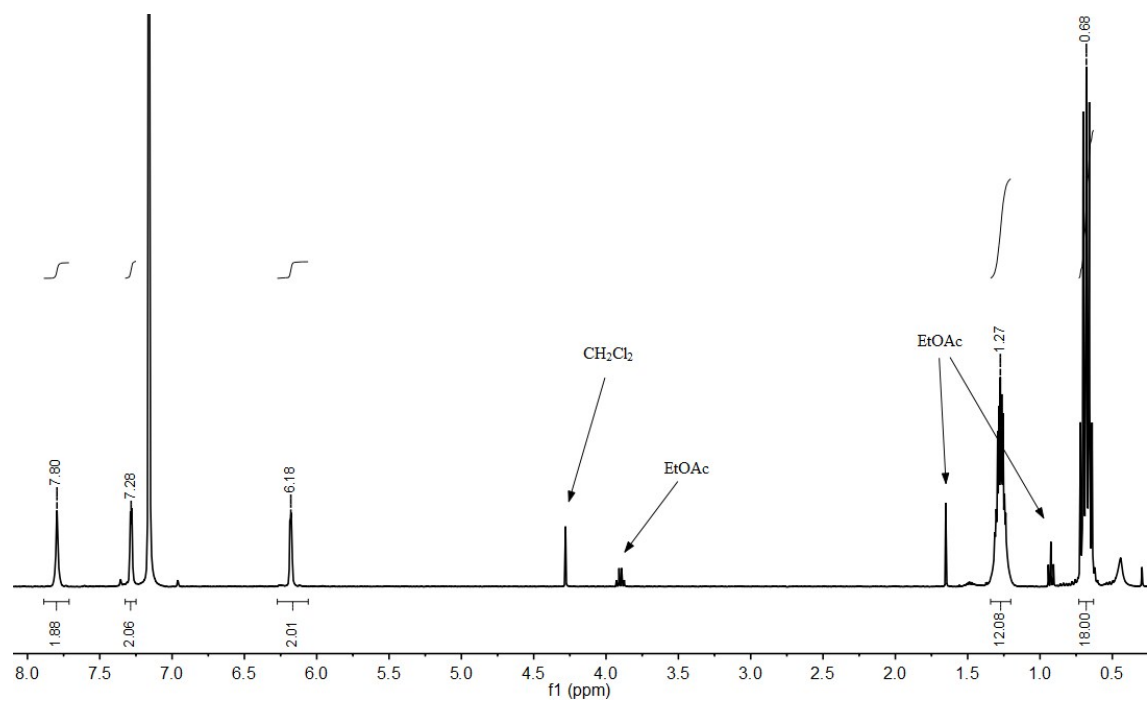

**Figure S12:**  $^1\text{H}$  NMR spectrum of Pt-NCS in  $\text{C}_6\text{D}_6$ .

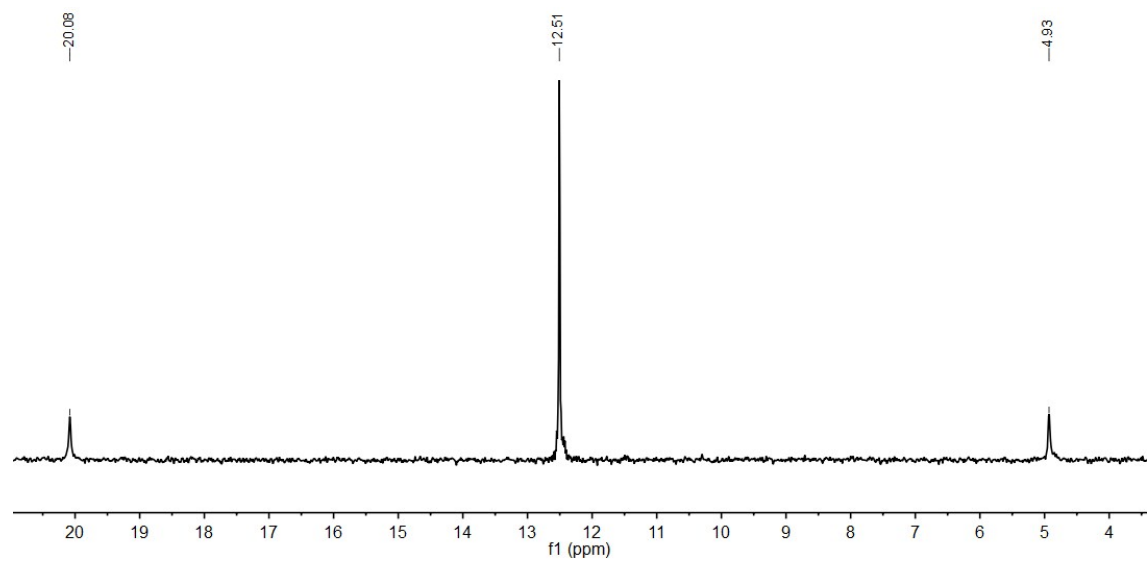

**Figure S13:**  $^{31}\text{P}\{^1\text{H}\}$  NMR spectrum of Pt-NCS in  $\text{C}_6\text{D}_6$ .

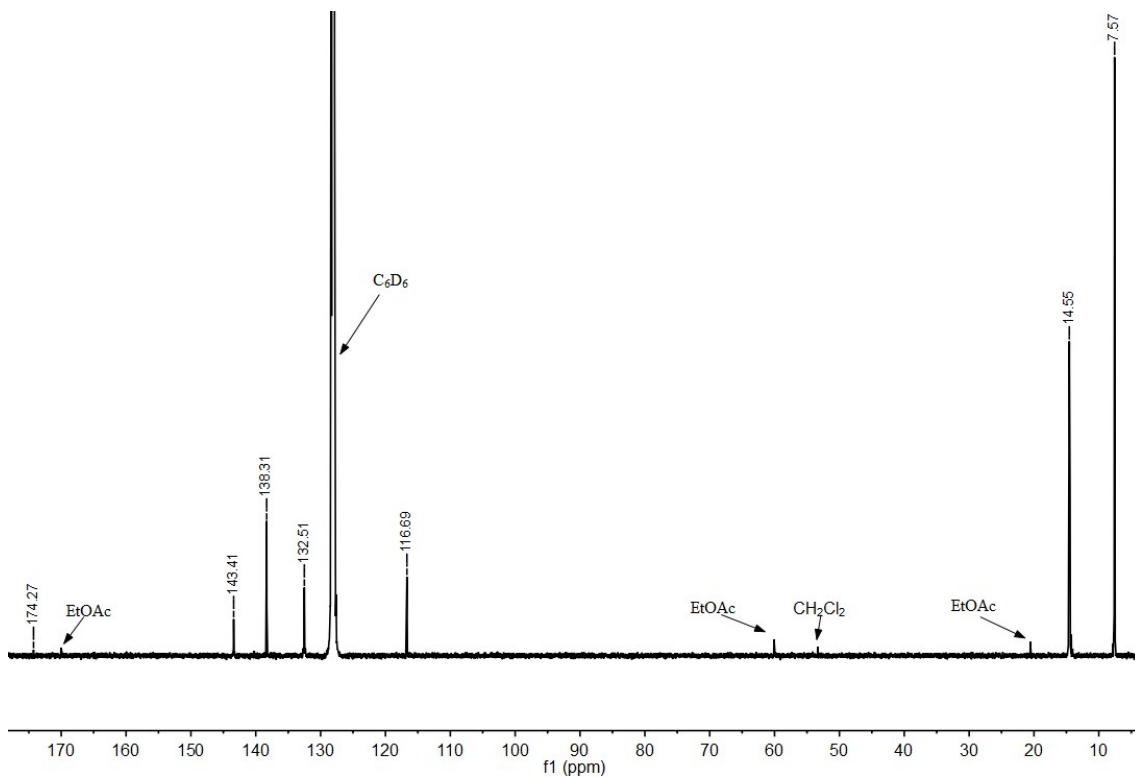

**Figure S14:**  $^{13}\text{C}\{^1\text{H}\}$  NMR spectrum of Pt-NCS in  $\text{C}_6\text{D}_6$ .

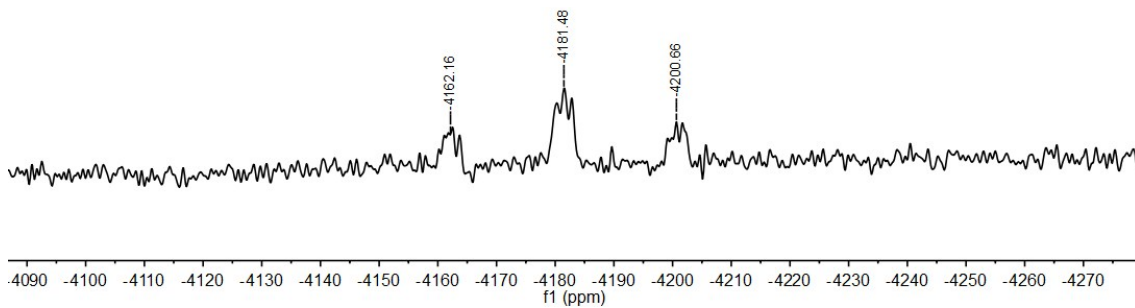

**Figure S15:**  $^{195}\text{Pt}\{^1\text{H}\}$  NMR spectrum of Pt-NCS in  $\text{C}_6\text{D}_6$ .

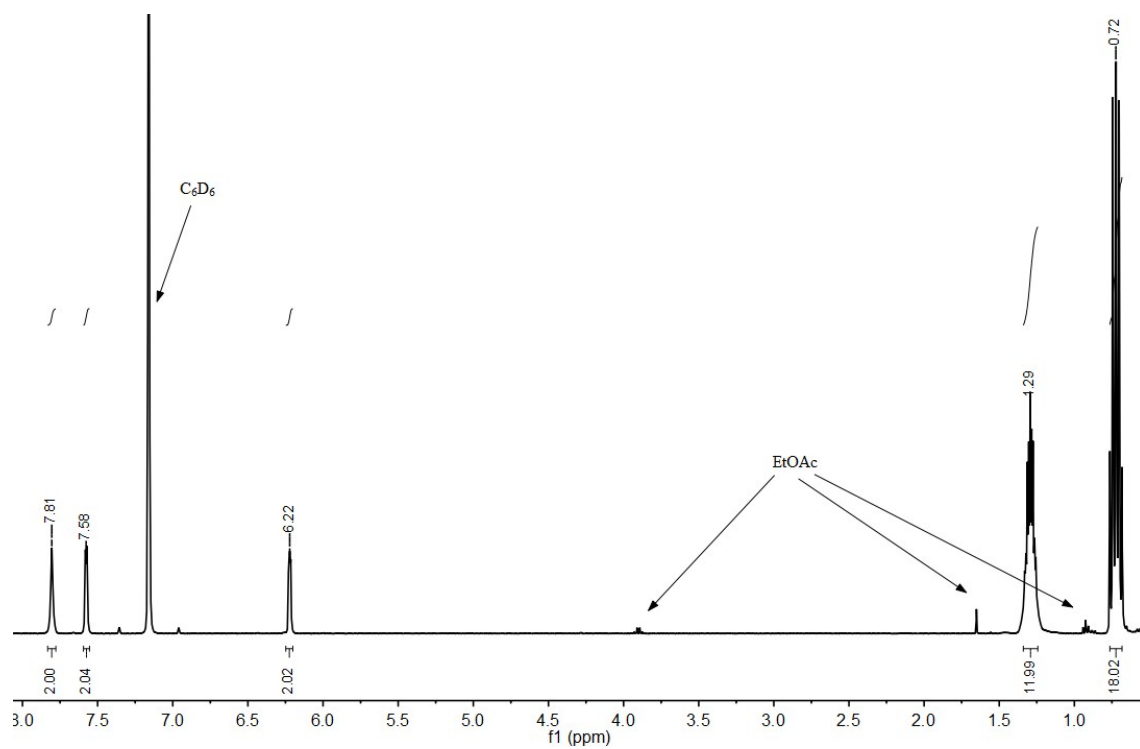

**Figure S16:**  $^1\text{H}$  NMR spectrum of  $\text{Pt-NO}_2$  in  $\text{C}_6\text{D}_6$ .

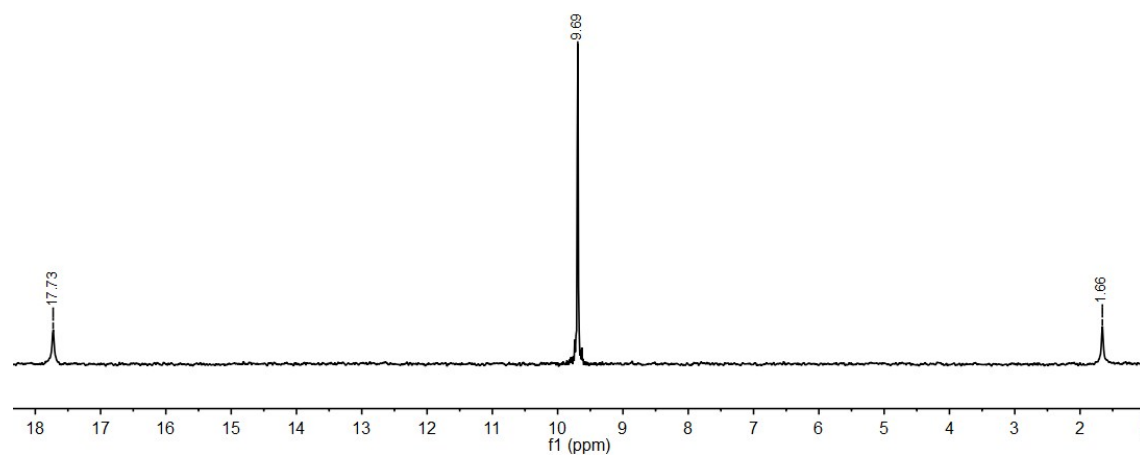

**Figure S17:**  $^{31}\text{P}\{^1\text{H}\}$  NMR spectrum of  $\text{Pt-NO}_2$  in  $\text{C}_6\text{D}_6$ .

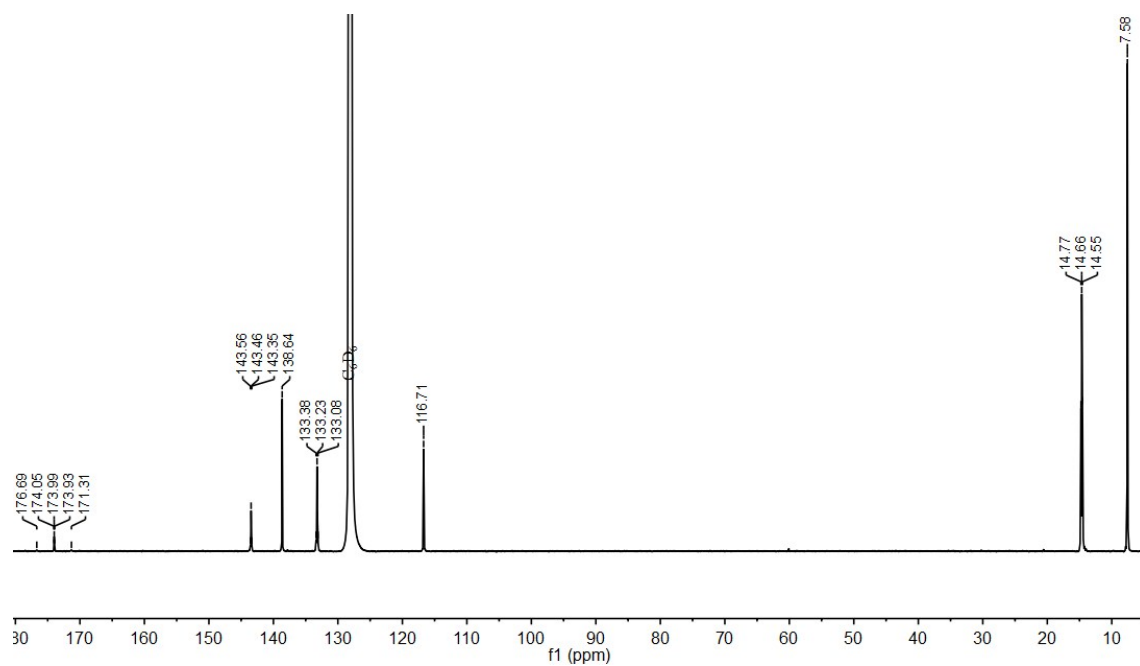

**Figure S18:**  $^{13}\text{C}\{^1\text{H}\}$  NMR spectrum of  $\text{Pt-NO}_2$  in  $\text{C}_6\text{D}_6$ .

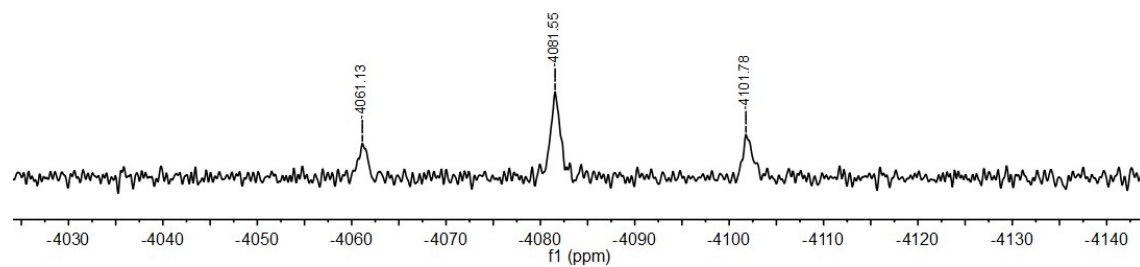

**Figure S19:**  $^{195}\text{Pt}\{^1\text{H}\}$  NMR spectrum of  $\text{Pt-NO}_2$  in  $\text{C}_6\text{D}_6$ .

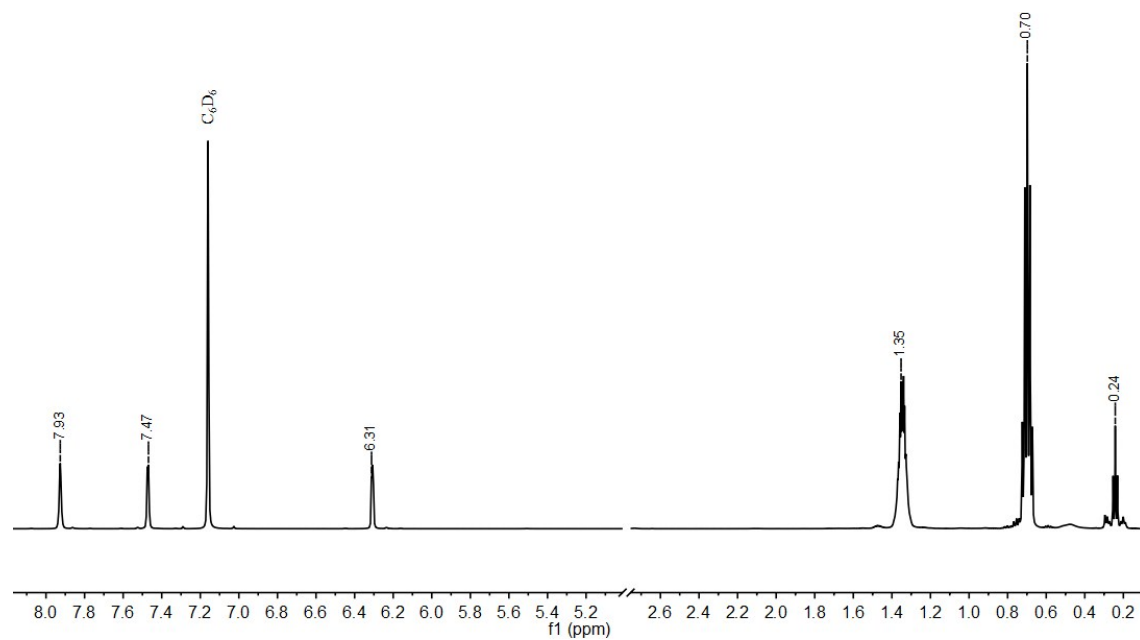

**Figure S20:**  $^1\text{H}$  NMR spectrum of  $\text{Pt-CH}_3$  in  $\text{C}_6\text{D}_6$ .

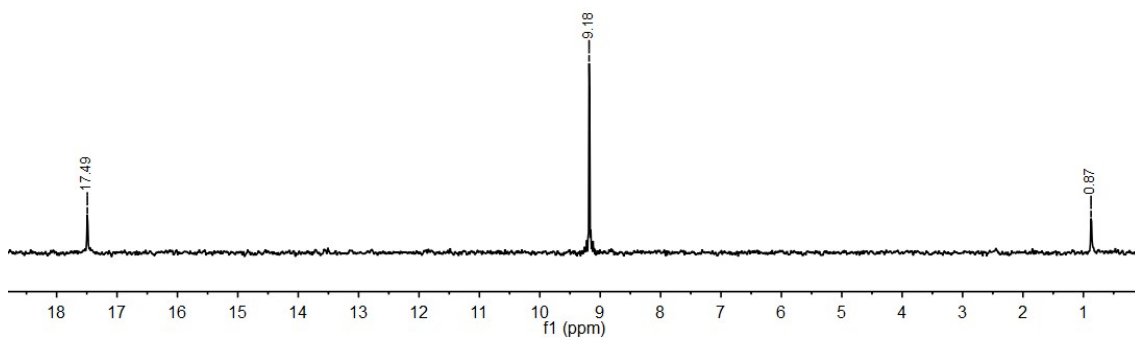

**Figure S21:**  $^{31}\text{P}\{^1\text{H}\}$  NMR spectrum of  $\text{Pt-CH}_3$  in  $\text{C}_6\text{D}_6$ .

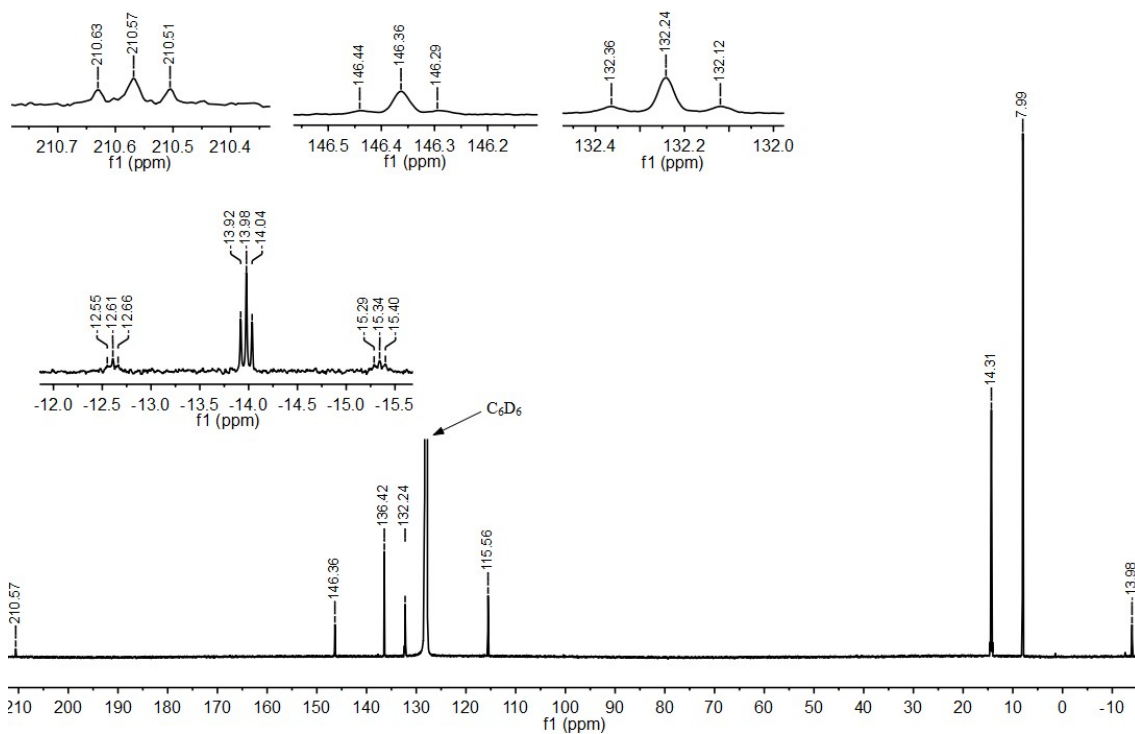

**Figure S22:**  $^{13}\text{C}\{^1\text{H}\}$  NMR spectrum of  $\text{Pt-CH}_3$  in  $\text{C}_6\text{D}_6$ .

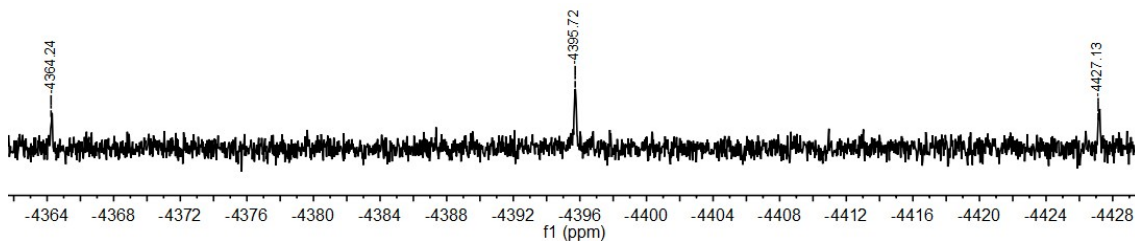

**Figure S23:**  $^{195}\text{Pt}\{^1\text{H}\}$  NMR spectrum of  $\text{Pt-CH}_3$  in  $\text{C}_6\text{D}_6$ .

## Single Crystal X-ray Diffraction

**Table S1:** Crystal and refinement data for **Pt-Cl**, **Pt-I**, **Pt-NCS**, **Pt-NO<sub>2</sub>** and **Pt-CH<sub>3</sub>**.

|                                             | <b>Pt-Cl</b>                                                                                             | <b>Pt-I</b>                                                                               | <b>Pt-NCS</b>                                                                              |
|---------------------------------------------|----------------------------------------------------------------------------------------------------------|-------------------------------------------------------------------------------------------|--------------------------------------------------------------------------------------------|
| Emp. formula / f. wt. / g mol <sup>-1</sup> | C <sub>21</sub> H <sub>36</sub> BClF <sub>2</sub> N <sub>2</sub> P <sub>2</sub> Pt / 657.81              | C <sub>21</sub> H <sub>36</sub> F <sub>2</sub> IN <sub>2</sub> P <sub>2</sub> Pt / 749.26 | C <sub>22</sub> H <sub>36</sub> BF <sub>2</sub> N <sub>3</sub> P <sub>2</sub> PtS / 680.44 |
| Temperature / K                             | 100(2)                                                                                                   | 100(2)                                                                                    | 100(2)                                                                                     |
| Crystal system                              | monoclinic                                                                                               | orthorhombic                                                                              | monoclinic                                                                                 |
| Space group                                 | P 2 <sub>1</sub> /c                                                                                      | C m c 2 <sub>1</sub>                                                                      | P 2 <sub>1</sub> /n                                                                        |
| a, b, c / Å                                 | 17.4058(6), 17.0196(5),<br>17.2625(6)                                                                    | 13.4838(7), 14.5951(10),<br>13.7759(7)                                                    | 9.3599(4), 18.0669(7),<br>16.1360(7)                                                       |
| α, β, γ / deg                               | 90, 94.973(3), 90                                                                                        | 90, 90, 90                                                                                | 90, 104.104(3), 90                                                                         |
| V / Å <sup>3</sup>                          | 5094.6(3)                                                                                                | 2711.1(3)                                                                                 | 2646.41(19)                                                                                |
| Z                                           | 8                                                                                                        | 4                                                                                         | 4                                                                                          |
| D <sub>calcd</sub> / g cm <sup>-3</sup>     | 1.715                                                                                                    | 1.836                                                                                     | 1.708                                                                                      |
| Absorption coefficient / mm <sup>-1</sup>   | 5.765                                                                                                    | 6.457                                                                                     | 5.531                                                                                      |
| θ range for data collection / deg           | 1.677 to 28.061                                                                                          | 2.056 to 26.795                                                                           | 1.722 to 27.343                                                                            |
| Limiting Indices                            | -22≤h≤22, -22≤k≤22, -22≤l≤22                                                                             | -17≤h≤17, -18≤k≤18, -17≤l≤17                                                              | -12≤h≤12, -23≤k≤23, -20≤l≤20                                                               |
| Reflections collected / unique (> 2σ(I))    | 83167 / 12219                                                                                            | 18705 / 2982                                                                              | 41294 / 5964                                                                               |
|                                             | [R(int) = 0.0818]                                                                                        | [R(int) = 0.0936]                                                                         | [R(int) = 0.0666]                                                                          |
| Data / Restraints / Parameter               | 12219 / 0 / 553                                                                                          | 2982 / 1 / 160                                                                            | 5964 / 0 / 319                                                                             |
| R (I > 2σ(I))                               | R <sub>1</sub> = 0.0484, wR <sub>2</sub> = 0.0747                                                        | R <sub>1</sub> = 0.0255, wR <sub>2</sub> = 0.0632                                         | R <sub>1</sub> = 0.0311, wR <sub>2</sub> = 0.0757                                          |
| R <sub>w</sub> (all data)                   | R <sub>1</sub> = 0.0620, wR <sub>2</sub> = 0.0755                                                        | R <sub>1</sub> = 0.0282, wR <sub>2</sub> = 0.0640                                         | R <sub>1</sub> = 0.0346, wR <sub>2</sub> = 0.0773                                          |
| Goof (all Data)                             | 2.128                                                                                                    | 1.120                                                                                     | 1.040                                                                                      |
| Max. and min. res. dens. / eÅ <sup>-3</sup> | 2.559 and -2.016                                                                                         | 1.607 and -1.633                                                                          | 2.892 and -1.740                                                                           |
|                                             | <b>Pt-NO<sub>2</sub></b>                                                                                 | <b>Pt-CH<sub>3</sub></b>                                                                  |                                                                                            |
| Emp. formula / f. wt. / g mol <sup>-1</sup> | C <sub>21</sub> H <sub>36</sub> BF <sub>2</sub> N <sub>3</sub> O <sub>2</sub> P <sub>2</sub> Pt / 668.37 | C <sub>22</sub> H <sub>39</sub> BF <sub>2</sub> N <sub>2</sub> P <sub>2</sub> Pt / 637.39 |                                                                                            |
| Temperature / K                             | 100(2)                                                                                                   | 100(2)                                                                                    |                                                                                            |
| Crystal system                              | monoclinic                                                                                               | monoclinic                                                                                |                                                                                            |
| Space group                                 | P 2 <sub>1</sub> /c                                                                                      | P 2 <sub>1</sub>                                                                          |                                                                                            |
| a, b, c / Å                                 | 9.6174(6), 16.8233(8),<br>16.3882(10)                                                                    | 11.0980(4), 13.1409(6),<br>18.4244(6)                                                     |                                                                                            |
| α, β, γ / deg                               | 90, 103.184(5), 90                                                                                       | 90, 106.287(3), 90                                                                        |                                                                                            |
| V / Å <sup>3</sup>                          | 2581.7(3)                                                                                                | 2579.14(18)                                                                               |                                                                                            |
| Z                                           | 4                                                                                                        | 4                                                                                         |                                                                                            |
| D <sub>calcd</sub> / g cm <sup>-3</sup>     | 1.720                                                                                                    | 1.641                                                                                     |                                                                                            |
| Absorption coefficient / mm <sup>-1</sup>   | 5.596                                                                                                    | 5.590                                                                                     |                                                                                            |
| θ range for data collection / deg           | 1.759 to 26.067                                                                                          | 1.912 to 25.981                                                                           |                                                                                            |
| Limiting Indices                            | -11≤h≤11, -20≤k≤20, -20≤l≤19                                                                             | -13≤h≤13, -16≤k≤16, -22≤l≤22                                                              |                                                                                            |
| Reflections collected / unique (> 2σ(I))    | 33380 / 5044                                                                                             | 33984 / 10000                                                                             |                                                                                            |
|                                             | [R(int) = 0.1517]                                                                                        | [R(int) = 0.0379]                                                                         |                                                                                            |
| Data / Restraints / Parameter               | 5044 / 0 / 295                                                                                           | 10000 / 1 / 555                                                                           |                                                                                            |
| R (I > 2σ(I))                               | R <sub>1</sub> = 0.0544, wR <sub>2</sub> = 0.0560                                                        | R <sub>1</sub> = 0.0344, wR <sub>2</sub> = 0.0747                                         |                                                                                            |
| R <sub>w</sub> (all data)                   | R <sub>1</sub> = 0.0985, wR <sub>2</sub> = 0.0620                                                        | R <sub>1</sub> = 0.0370, wR <sub>2</sub> = 0.0756                                         |                                                                                            |
| Goof (all Data)                             | 0.995                                                                                                    | 1.049                                                                                     |                                                                                            |
| Max. and min. res. dens. / eÅ <sup>-3</sup> | 1.887 and -3.164                                                                                         | 1.338 and -1.047                                                                          |                                                                                            |

**Table S2:** Bond lengths [Å] and angles [°] for **Pt-Cl**.

|             |           |                   |            |                  |           |
|-------------|-----------|-------------------|------------|------------------|-----------|
| C(1)-C(2)   | 1.411(9)  | B(2)-N(4)         | 1.549(9)   | F(4)-B(2)-N(3)   | 110.4(6)  |
| C(1)-C(6)   | 1.427(8)  | Cl(1)-Pt(1)       | 2.3742(16) | F(3)-B(2)-N(4)   | 109.7(6)  |
| C(1)-Pt(1)  | 1.980(6)  | Cl(2)-Pt(2)       | 2.3842(16) | F(4)-B(2)-N(4)   | 109.6(6)  |
| C(2)-C(3)   | 1.386(8)  | P(1)-Pt(1)        | 2.3173(17) | N(3)-B(2)-N(4)   | 106.6(5)  |
| C(2)-N(1)   | 1.393(8)  | P(2)-Pt(1)        | 2.3097(16) | C(5)-N(1)-C(2)   | 108.4(5)  |
| C(3)-C(4)   | 1.388(9)  | P(3)-Pt(2)        | 2.3158(18) | C(5)-N(1)-B(1)   | 126.0(6)  |
| C(4)-C(5)   | 1.403(9)  | P(4)-Pt(2)        | 2.3120(18) | C(2)-N(1)-B(1)   | 125.3(6)  |
| C(5)-N(1)   | 1.339(8)  | C(2)-C(1)-C(6)    | 117.5(6)   | C(9)-N(2)-C(6)   | 107.3(6)  |
| C(6)-N(2)   | 1.394(8)  | C(2)-C(1)-Pt(1)   | 120.6(4)   | C(9)-N(2)-B(1)   | 125.2(5)  |
| C(6)-C(7)   | 1.402(9)  | C(6)-C(1)-Pt(1)   | 121.8(5)   | C(6)-N(2)-B(1)   | 127.2(5)  |
| C(7)-C(8)   | 1.378(9)  | C(3)-C(2)-N(1)    | 107.3(6)   | C(26)-N(3)-C(23) | 107.4(5)  |
| C(8)-C(9)   | 1.383(10) | C(3)-C(2)-C(1)    | 129.6(6)   | C(26)-N(3)-B(2)  | 127.0(6)  |
| C(9)-N(2)   | 1.360(8)  | N(1)-C(2)-C(1)    | 122.7(6)   | C(23)-N(3)-B(2)  | 125.5(5)  |
| C(10)-C(11) | 1.535(9)  | C(4)-C(3)-C(2)    | 108.5(6)   | C(30)-N(4)-C(27) | 108.4(6)  |
| C(10)-P(1)  | 1.820(7)  | C(3)-C(4)-C(5)    | 106.1(6)   | C(30)-N(4)-B(2)  | 126.8(6)  |
| C(12)-C(13) | 1.526(10) | N(1)-C(5)-C(4)    | 109.7(6)   | C(27)-N(4)-B(2)  | 124.5(5)  |
| C(12)-P(1)  | 1.799(8)  | N(2)-C(6)-C(7)    | 107.8(5)   | C(12)-P(1)-C(10) | 107.4(3)  |
| C(14)-C(15) | 1.526(11) | N(2)-C(6)-C(1)    | 121.2(6)   | C(12)-P(1)-C(14) | 101.5(4)  |
| C(14)-P(1)  | 1.838(7)  | C(7)-C(6)-C(1)    | 131.0(6)   | C(10)-P(1)-C(14) | 106.9(3)  |
| C(16)-C(17) | 1.544(9)  | C(8)-C(7)-C(6)    | 107.5(6)   | C(12)-P(1)-Pt(1) | 111.9(2)  |
| C(16)-P(2)  | 1.823(7)  | C(7)-C(8)-C(9)    | 107.6(6)   | C(10)-P(1)-Pt(1) | 114.6(2)  |
| C(18)-C(19) | 1.514(9)  | N(2)-C(9)-C(8)    | 109.8(6)   | C(14)-P(1)-Pt(1) | 113.6(2)  |
| C(18)-P(2)  | 1.823(7)  | C(11)-C(10)-P(1)  | 116.3(6)   | C(20)-P(2)-C(18) | 102.3(3)  |
| C(20)-C(21) | 1.533(10) | C(13)-C(12)-P(1)  | 112.8(6)   | C(20)-P(2)-C(16) | 106.3(3)  |
| C(20)-P(2)  | 1.817(6)  | C(15)-C(14)-P(1)  | 114.0(5)   | C(18)-P(2)-C(16) | 107.3(3)  |
| C(22)-C(23) | 1.406(8)  | C(17)-C(16)-P(2)  | 117.3(5)   | C(20)-P(2)-Pt(1) | 112.8(2)  |
| C(22)-C(27) | 1.414(8)  | C(19)-C(18)-P(2)  | 114.8(4)   | C(18)-P(2)-Pt(1) | 112.5(2)  |
| C(22)-Pt(2) | 1.969(6)  | C(21)-C(20)-P(2)  | 114.3(5)   | C(16)-P(2)-Pt(1) | 114.7(2)  |
| C(23)-N(3)  | 1.391(8)  | C(23)-C(22)-C(27) | 117.1(6)   | C(37)-P(3)-C(39) | 106.4(4)  |
| C(23)-C(24) | 1.413(8)  | C(23)-C(22)-Pt(2) | 121.7(5)   | C(37)-P(3)-C(41) | 106.5(4)  |
| C(24)-C(25) | 1.409(9)  | C(27)-C(22)-Pt(2) | 121.2(5)   | C(39)-P(3)-C(41) | 102.7(3)  |
| C(25)-C(26) | 1.363(10) | C(22)-C(23)-N(3)  | 122.8(6)   | C(37)-P(3)-Pt(2) | 115.0(2)  |
| C(26)-N(3)  | 1.370(9)  | C(22)-C(23)-C(24) | 129.3(6)   | C(39)-P(3)-Pt(2) | 111.8(2)  |
| C(27)-C(28) | 1.396(9)  | N(3)-C(23)-C(24)  | 107.9(5)   | C(41)-P(3)-Pt(2) | 113.4(3)  |
| C(27)-N(4)  | 1.397(8)  | C(25)-C(24)-C(23) | 106.7(6)   | C(33)-P(4)-C(35) | 105.5(3)  |
| C(28)-C(29) | 1.385(9)  | C(26)-C(25)-C(24) | 107.5(6)   | C(33)-P(4)-C(31) | 106.2(3)  |
| C(29)-C(30) | 1.397(10) | N(3)-C(26)-C(25)  | 110.5(6)   | C(35)-P(4)-C(31) | 103.4(3)  |
| C(30)-N(4)  | 1.336(8)  | C(28)-C(27)-N(4)  | 107.0(6)   | C(33)-P(4)-Pt(2) | 110.8(2)  |
| C(31)-C(32) | 1.526(9)  | C(28)-C(27)-C(22) | 130.4(6)   | C(35)-P(4)-Pt(2) | 109.7(2)  |
| C(31)-P(4)  | 1.844(6)  | N(4)-C(27)-C(22)  | 122.5(6)   | C(31)-P(4)-Pt(2) | 120.1(3)  |
| C(33)-C(34) | 1.537(9)  | C(29)-C(28)-C(27) | 108.3(6)   | C(1)-Pt(1)-P(2)  | 93.91(17) |
| C(33)-P(4)  | 1.824(7)  | C(28)-C(29)-C(30) | 106.4(6)   | C(1)-Pt(1)-P(1)  | 91.33(17) |

|             |           |                  |          |                   |            |
|-------------|-----------|------------------|----------|-------------------|------------|
| C(35)-C(36) | 1.556(10) | N(4)-C(30)-C(29) | 109.9(6) | P(2)-Pt(1)-P(1)   | 174.76(6)  |
| C(35)-P(4)  | 1.839(7)  | C(32)-C(31)-P(4) | 114.6(5) | C(1)-Pt(1)-Cl(1)  | 178.39(18) |
| C(37)-C(38) | 1.533(10) | C(34)-C(33)-P(4) | 114.5(5) | P(2)-Pt(1)-Cl(1)  | 87.59(6)   |
| C(37)-P(3)  | 1.822(8)  | C(36)-C(35)-P(4) | 115.9(5) | P(1)-Pt(1)-Cl(1)  | 87.17(6)   |
| C(39)-C(40) | 1.525(9)  | C(38)-C(37)-P(3) | 116.7(5) | C(22)-Pt(2)-P(4)  | 92.85(18)  |
| C(39)-P(3)  | 1.825(7)  | C(40)-C(39)-P(3) | 114.1(4) | C(22)-Pt(2)-P(3)  | 91.69(18)  |
| C(41)-C(42) | 1.508(9)  | C(42)-C(41)-P(3) | 114.3(5) | P(4)-Pt(2)-P(3)   | 175.07(6)  |
| C(41)-P(3)  | 1.825(7)  | F(1)-B(1)-F(2)   | 109.0(6) | C(22)-Pt(2)-Cl(2) | 179.19(19) |
| B(1)-F(1)   | 1.388(8)  | F(1)-B(1)-N(2)   | 110.1(6) | P(4)-Pt(2)-Cl(2)  | 87.82(6)   |
| B(1)-F(2)   | 1.379(9)  | F(2)-B(1)-N(2)   | 112.5(6) | P(3)-Pt(2)-Cl(2)  | 87.66(6)   |
| B(1)-N(2)   | 1.528(10) | F(1)-B(1)-N(1)   | 108.9(5) |                   |            |
| B(1)-N(1)   | 1.561(9)  | F(2)-B(1)-N(1)   | 110.5(6) |                   |            |
| B(2)-F(3)   | 1.389(9)  | N(2)-B(1)-N(1)   | 105.6(5) |                   |            |
| B(2)-F(4)   | 1.404(8)  | F(3)-B(2)-F(4)   | 108.9(6) |                   |            |
| B(2)-N(3)   | 1.527(10) | F(3)-B(2)-N(3)   | 111.6(6) |                   |            |

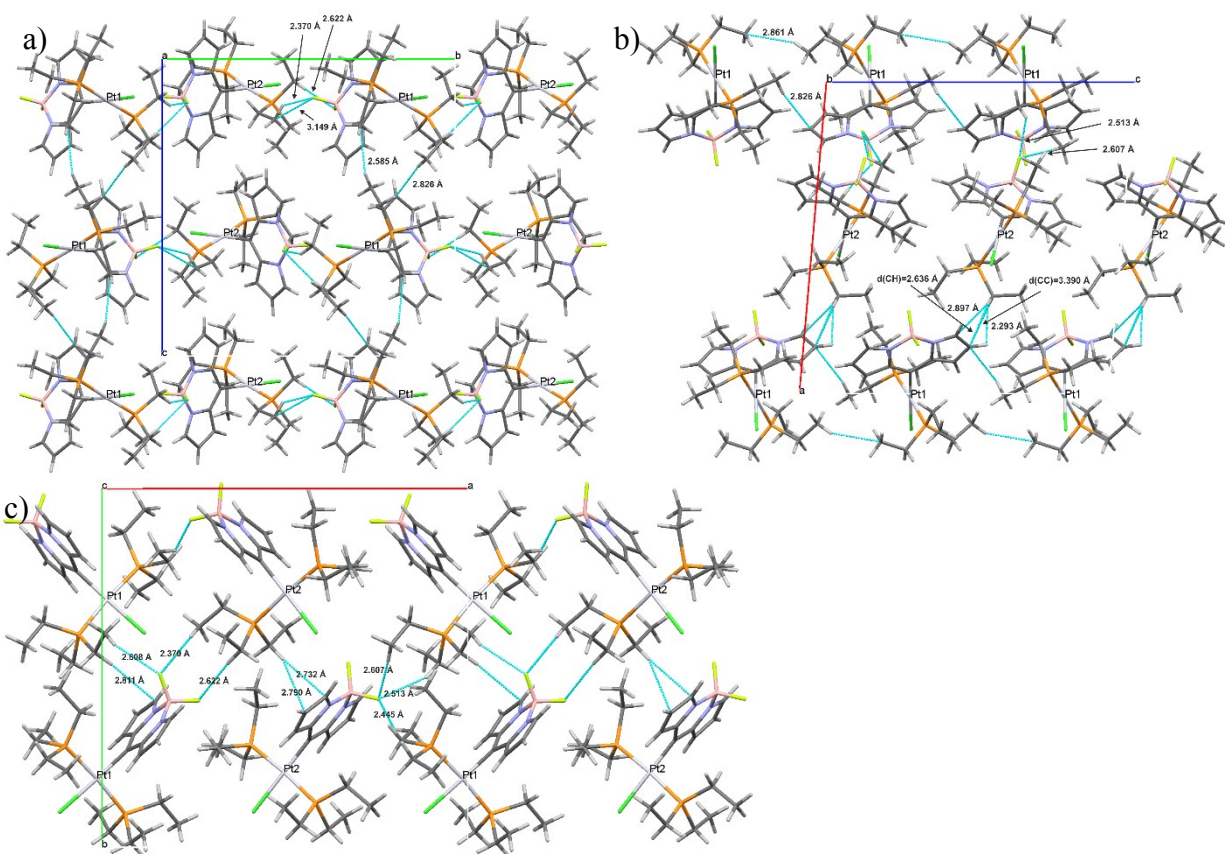

Figure S24: Packing of molecules of Pt-Cl along the crystallographic *a* (a), *b* (b), and *c* axis (c).

Table S3: Bond lengths [Å] and angles [°] for Pt-I.



---

|              |            |                   |           |                  |           |
|--------------|------------|-------------------|-----------|------------------|-----------|
| Pt(1)-C(1)   | 1.994(10)  | C(1)-Pt(1)-P(1)   | 91.37(7)  | N(1)-C(5)-C(4)   | 108.9(9)  |
| Pt(1)-P(1)   | 2.3206(15) | C(1)-Pt(1)-P(1)#1 | 91.37(7)  | C(1)-C(6)-N(2)   | 121.1(9)  |
| Pt(1)-P(1)#1 | 2.3207(15) | P(1)-Pt(1)-P(1)#1 | 176.03(8) | C(1)-C(6)-C(7)   | 132.0(9)  |
| Pt(1)-I(1)   | 2.6689(8)  | C(1)-Pt(1)-I(1)   | 176.8(3)  | N(2)-C(6)-C(7)   | 106.9(8)  |
| N(1)-C(5)    | 1.361(12)  | P(1)-Pt(1)-I(1)   | 88.71(7)  | C(8)-C(7)-C(6)   | 109.0(10) |
| N(1)-C(2)    | 1.402(13)  | P(1)#1-Pt(1)-I(1) | 88.71(7)  | C(7)-C(8)-C(9)   | 106.3(10) |
| N(1)-B(1)    | 1.538(15)  | C(5)-N(1)-C(2)    | 108.6(9)  | N(2)-C(9)-C(8)   | 110.0(10) |
| N(2)-C(9)    | 1.351(14)  | C(5)-N(1)-B(1)    | 124.1(10) | C(12)-P(1)-C(14) | 102.3(4)  |
| N(2)-C(6)    | 1.408(13)  | C(2)-N(1)-B(1)    | 127.3(9)  | C(12)-P(1)-C(10) | 105.5(4)  |
| N(2)-B(1)    | 1.556(13)  | C(9)-N(2)-C(6)    | 107.8(9)  | C(14)-P(1)-C(10) | 105.7(4)  |
| B(1)-F(1)    | 1.382(8)   | C(9)-N(2)-B(1)    | 125.1(10) | C(12)-P(1)-Pt(1) | 115.0(3)  |
| B(1)-F(1)#1  | 1.382(8)   | C(6)-N(2)-B(1)    | 127.0(9)  | C(14)-P(1)-Pt(1) | 113.1(2)  |
| C(1)-C(6)    | 1.403(13)  | F(1)-B(1)-F(1)#1  | 109.7(9)  | C(10)-P(1)-Pt(1) | 114.1(3)  |
| C(1)-C(2)    | 1.412(13)  | F(1)-B(1)-N(1)    | 111.6(6)  | C(11)-C(10)-P(1) | 116.2(6)  |
| C(2)-C(3)    | 1.407(14)  | F(1)#1-B(1)-N(1)  | 111.6(6)  | C(13)-C(12)-P(1) | 113.8(6)  |
| C(3)-C(4)    | 1.393(14)  | F(1)-B(1)-N(2)    | 109.7(6)  | C(15)-C(14)-P(1) | 113.9(6)  |
| C(4)-C(5)    | 1.392(17)  | F(1)#1-B(1)-N(2)  | 109.7(6)  |                  |           |
| C(6)-C(7)    | 1.410(15)  | N(1)-B(1)-N(2)    | 104.6(9)  |                  |           |
| C(7)-C(8)    | 1.374(17)  | C(6)-C(1)-C(2)    | 118.6(9)  |                  |           |
| C(8)-C(9)    | 1.416(18)  | C(6)-C(1)-Pt(1)   | 122.3(7)  |                  |           |
| P(1)-C(12)   | 1.818(10)  | C(2)-C(1)-Pt(1)   | 119.1(7)  |                  |           |
| P(1)-C(14)   | 1.827(6)   | N(1)-C(2)-C(3)    | 107.0(9)  |                  |           |
| P(1)-C(10)   | 1.832(9)   | N(1)-C(2)-C(1)    | 121.4(9)  |                  |           |
| C(10)-C(11)  | 1.539(11)  | C(3)-C(2)-C(1)    | 131.5(10) |                  |           |
| C(12)-C(13)  | 1.540(13)  | C(4)-C(3)-C(2)    | 107.6(10) |                  |           |
| C(15)-C(14)  | 1.536(14)  | C(5)-C(4)-C(3)    | 107.8(9)  |                  |           |

---

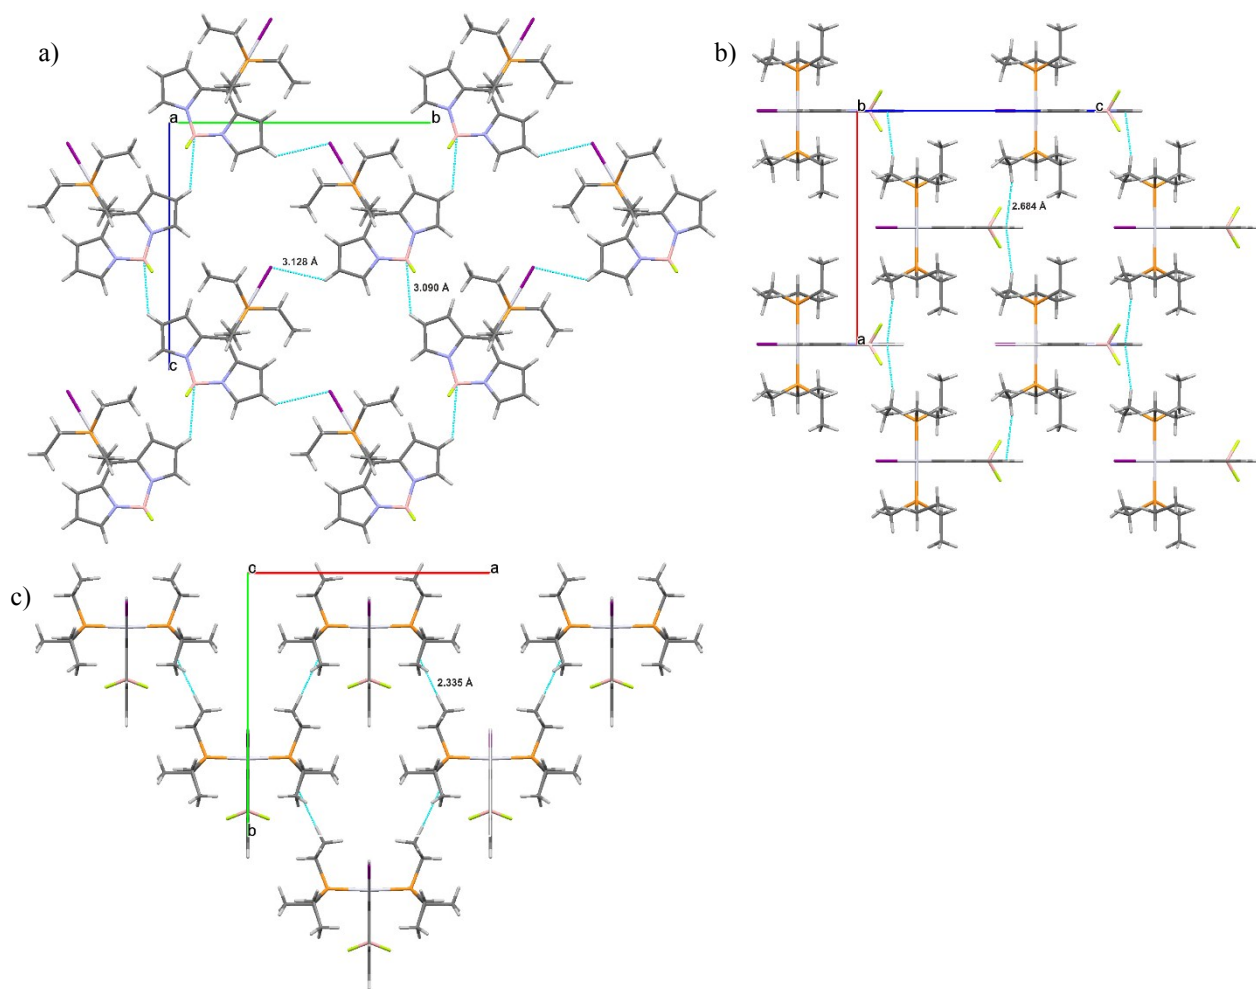

**Figure S25:** Packing of molecules of Pt-I along the crystallographic *a* (a), *b* (b), and *c* axis (c).

**Table S4:** Bond lengths [Å] and angles [°] for **Pt-NCS**.

|             |          |                  |            |                  |            |
|-------------|----------|------------------|------------|------------------|------------|
| C(1)-C(2)   | 1.404(6) | B(1)-N(1)        | 1.546(6)   | F(2)-B(1)-N(1)   | 110.6(4)   |
| C(1)-C(6)   | 1.413(6) | N(3)-Pt(1)       | 2.048(4)   | N(2)-B(1)-N(1)   | 106.4(3)   |
| C(1)-Pt(1)  | 1.984(4) | P(1)-Pt(1)       | 2.3135(13) | C(5)-N(1)-C(2)   | 108.4(4)   |
| C(2)-N(1)   | 1.395(5) | P(2)-Pt(1)       | 2.3249(11) | C(5)-N(1)-B(1)   | 125.9(4)   |
| C(2)-C(3)   | 1.412(6) | C(2)-C(1)-C(6)   | 117.9(4)   | C(2)-N(1)-B(1)   | 125.6(3)   |
| C(3)-C(4)   | 1.374(6) | C(2)-C(1)-Pt(1)  | 122.1(3)   | C(9)-N(2)-C(6)   | 108.0(4)   |
| C(4)-C(5)   | 1.395(6) | C(6)-C(1)-Pt(1)  | 119.9(3)   | C(9)-N(2)-B(1)   | 126.3(4)   |
| C(5)-N(1)   | 1.340(6) | N(1)-C(2)-C(1)   | 122.2(4)   | C(6)-N(2)-B(1)   | 125.6(4)   |
| C(6)-N(2)   | 1.396(5) | N(1)-C(2)-C(3)   | 106.8(3)   | C(22)-N(3)-Pt(1) | 162.2(4)   |
| C(6)-C(7)   | 1.410(6) | C(1)-C(2)-C(3)   | 131.1(4)   | C(14)-P(1)-C(10) | 113.4(3)   |
| C(7)-C(8)   | 1.391(6) | C(4)-C(3)-C(2)   | 108.0(4)   | C(14)-P(1)-C(12) | 103.2(3)   |
| C(8)-C(9)   | 1.392(6) | C(3)-C(4)-C(5)   | 107.0(4)   | C(10)-P(1)-C(12) | 100.0(2)   |
| C(9)-N(2)   | 1.348(6) | N(1)-C(5)-C(4)   | 109.8(4)   | C(14)-P(1)-Pt(1) | 113.0(2)   |
| C(10)-C(11) | 1.504(8) | N(2)-C(6)-C(7)   | 107.4(4)   | C(10)-P(1)-Pt(1) | 120.87(16) |
| C(10)-P(1)  | 1.815(5) | N(2)-C(6)-C(1)   | 122.2(4)   | C(12)-P(1)-Pt(1) | 103.07(19) |
| C(12)-C(13) | 1.435(9) | C(7)-C(6)-C(1)   | 130.4(4)   | C(18)-P(2)-C(16) | 103.2(2)   |
| C(12)-P(1)  | 2.038(8) | C(8)-C(7)-C(6)   | 107.6(4)   | C(18)-P(2)-C(20) | 105.5(2)   |
| C(14)-C(15) | 1.477(9) | C(7)-C(8)-C(9)   | 106.8(4)   | C(16)-P(2)-C(20) | 105.5(2)   |
| C(14)-P(1)  | 1.765(6) | N(2)-C(9)-C(8)   | 110.3(4)   | C(18)-P(2)-Pt(1) | 111.63(16) |
| C(16)-C(17) | 1.525(7) | C(11)-C(10)-P(1) | 114.7(5)   | C(16)-P(2)-Pt(1) | 115.92(16) |
| C(16)-P(2)  | 1.823(4) | C(13)-C(12)-P(1) | 112.4(5)   | C(20)-P(2)-Pt(1) | 113.93(16) |
| C(18)-C(19) | 1.520(7) | C(15)-C(14)-P(1) | 117.4(6)   | C(1)-Pt(1)-N(3)  | 175.77(17) |
| C(18)-P(2)  | 1.822(4) | C(17)-C(16)-P(2) | 113.9(3)   | C(1)-Pt(1)-P(1)  | 91.44(12)  |
| C(20)-C(21) | 1.528(7) | C(19)-C(18)-P(2) | 113.2(3)   | N(3)-Pt(1)-P(1)  | 87.28(12)  |
| C(20)-P(2)  | 1.826(4) | C(21)-C(20)-P(2) | 115.1(3)   | C(1)-Pt(1)-P(2)  | 90.79(12)  |
| C(22)-N(3)  | 1.162(6) | N(3)-C(22)-S(1)  | 179.7(4)   | N(3)-Pt(1)-P(2)  | 90.62(11)  |
| C(22)-S(1)  | 1.625(4) | F(1)-B(1)-F(2)   | 108.7(3)   | P(1)-Pt(1)-P(2)  | 177.17(5)  |
| B(1)-F(1)   | 1.389(5) | F(1)-B(1)-N(2)   | 110.8(4)   |                  |            |
| B(1)-F(2)   | 1.394(5) | F(2)-B(1)-N(2)   | 110.1(4)   |                  |            |
| B(1)-N(2)   | 1.540(6) | F(1)-B(1)-N(1)   | 110.3(4)   |                  |            |

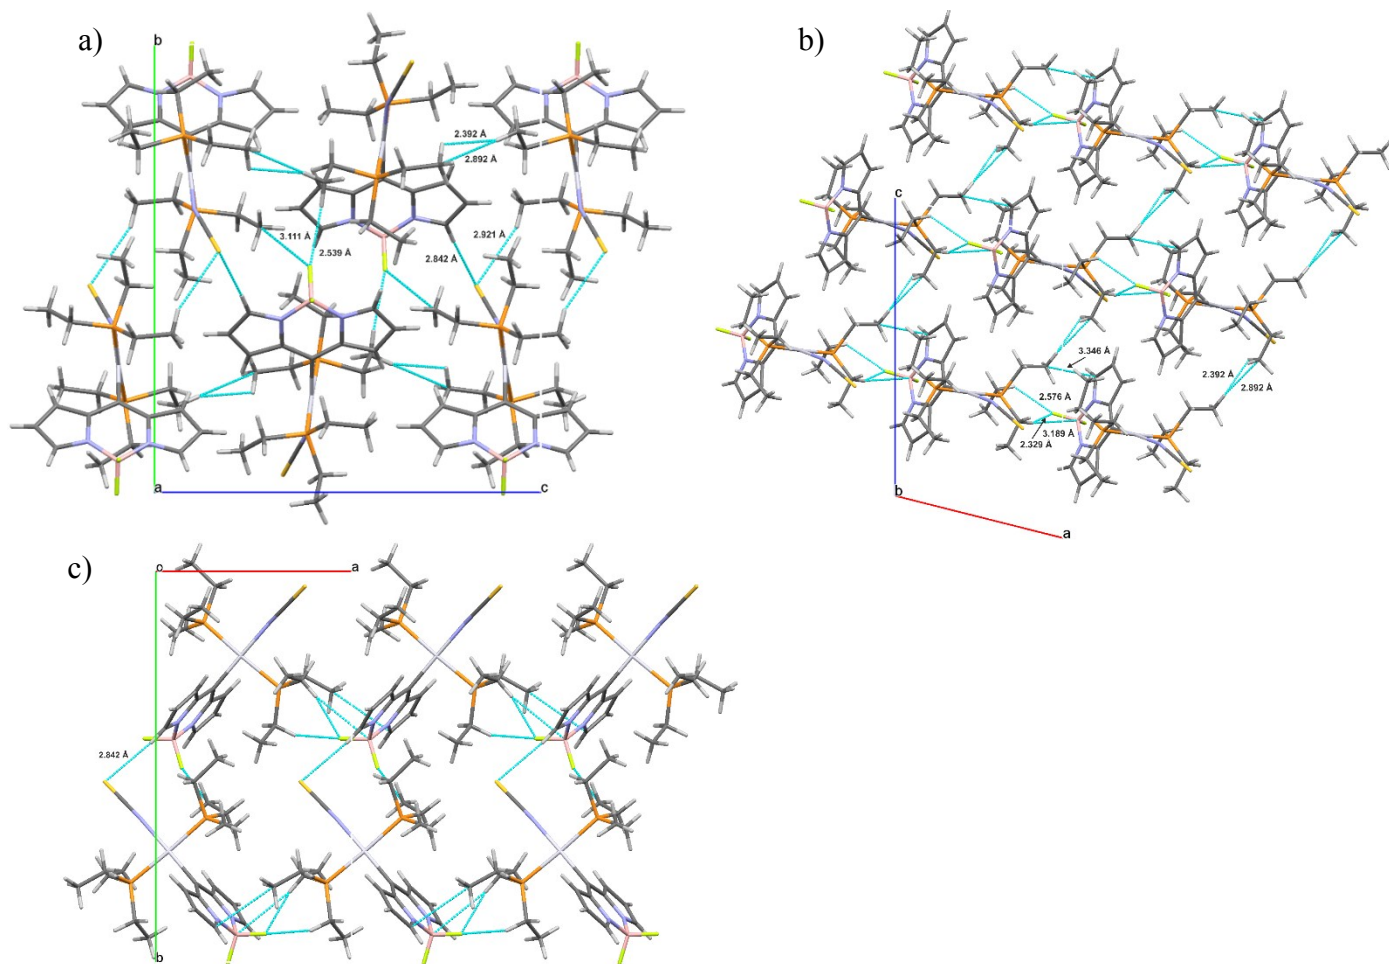

**Figure S26:** Packing of molecules of Pt-NCS along the crystallographic *a* (a), *b* (b), and *c* axis (c).

**Table S5:** Bond lengths [Å] and angles [°] for **Pt-NO<sub>2</sub>**.

|             |           |                  |           |                  |          |
|-------------|-----------|------------------|-----------|------------------|----------|
| Pt(1)-C(1)  | 1.956(9)  | C(14)-C(15)      | 1.515(12) | C(10)-P(1)-Pt(1) | 115.0(3) |
| Pt(1)-N(3)  | 2.019(8)  | C(16)-C(17)      | 1.546(11) | C(18)-P(2)-C(16) | 105.9(4) |
| Pt(1)-P(1)  | 2.329(2)  | C(18)-C(19)      | 1.527(11) | C(18)-P(2)-C(20) | 104.2(4) |
| Pt(1)-P(2)  | 2.334(2)  | C(20)-C(21)      | 1.521(11) | C(16)-P(2)-C(20) | 105.4(4) |
| B(1)-F(2)   | 1.389(9)  | C(1)-Pt(1)-N(3)  | 178.2(4)  | C(18)-P(2)-Pt(1) | 114.7(3) |
| B(1)-F(1)   | 1.398(10) | C(1)-Pt(1)-P(1)  | 92.3(3)   | C(16)-P(2)-Pt(1) | 113.1(3) |
| B(1)-N(1)   | 1.534(10) | N(3)-Pt(1)-P(1)  | 88.6(2)   | C(20)-P(2)-Pt(1) | 112.8(3) |
| B(1)-N(2)   | 1.548(11) | C(1)-Pt(1)-P(2)  | 89.3(3)   | C(6)-C(1)-C(2)   | 115.5(8) |
| N(1)-C(5)   | 1.342(10) | N(3)-Pt(1)-P(2)  | 90.0(2)   | C(6)-C(1)-Pt(1)  | 122.1(6) |
| N(1)-C(2)   | 1.419(9)  | P(1)-Pt(1)-P(2)  | 173.83(8) | C(2)-C(1)-Pt(1)  | 122.4(6) |
| N(2)-C(9)   | 1.352(10) | F(2)-B(1)-F(1)   | 108.4(6)  | C(3)-C(2)-N(1)   | 106.6(7) |
| N(2)-C(6)   | 1.409(9)  | F(2)-B(1)-N(1)   | 111.1(6)  | C(3)-C(2)-C(1)   | 130.9(7) |
| N(3)-O(1)   | 1.232(10) | F(1)-B(1)-N(1)   | 110.3(7)  | N(1)-C(2)-C(1)   | 122.5(7) |
| N(3)-O(2)   | 1.293(10) | F(2)-B(1)-N(2)   | 110.0(7)  | C(4)-C(3)-C(2)   | 108.4(7) |
| P(1)-C(14)  | 1.823(8)  | F(1)-B(1)-N(2)   | 110.1(6)  | C(3)-C(4)-C(5)   | 107.3(7) |
| P(1)-C(12)  | 1.826(8)  | N(1)-B(1)-N(2)   | 107.0(6)  | N(1)-C(5)-C(4)   | 110.5(7) |
| P(1)-C(10)  | 1.830(9)  | C(5)-N(1)-C(2)   | 107.2(6)  | C(1)-C(6)-N(2)   | 124.9(7) |
| P(2)-C(18)  | 1.814(9)  | C(5)-N(1)-B(1)   | 127.1(7)  | C(1)-C(6)-C(7)   | 128.9(7) |
| P(2)-C(16)  | 1.816(8)  | C(2)-N(1)-B(1)   | 125.7(7)  | N(2)-C(6)-C(7)   | 106.2(7) |
| P(2)-C(20)  | 1.830(8)  | C(9)-N(2)-C(6)   | 108.2(7)  | C(8)-C(7)-C(6)   | 108.3(8) |
| C(1)-C(6)   | 1.406(11) | C(9)-N(2)-B(1)   | 127.4(6)  | C(9)-C(8)-C(7)   | 106.6(7) |
| C(1)-C(2)   | 1.440(11) | C(6)-N(2)-B(1)   | 124.2(6)  | N(2)-C(9)-C(8)   | 110.7(7) |
| C(2)-C(3)   | 1.401(11) | O(1)-N(3)-O(2)   | 115.7(8)  | C(11)-C(10)-P(1) | 114.1(6) |
| C(3)-C(4)   | 1.368(11) | O(1)-N(3)-Pt(1)  | 124.0(6)  | C(13)-C(12)-P(1) | 113.0(5) |
| C(4)-C(5)   | 1.384(11) | O(2)-N(3)-Pt(1)  | 120.2(6)  | C(15)-C(14)-P(1) | 115.6(6) |
| C(6)-C(7)   | 1.423(11) | C(14)-P(1)-C(12) | 104.3(4)  | C(17)-C(16)-P(2) | 115.6(5) |
| C(7)-C(8)   | 1.392(11) | C(14)-P(1)-C(10) | 105.6(4)  | C(19)-C(18)-P(2) | 113.8(6) |
| C(8)-C(9)   | 1.389(12) | C(12)-P(1)-C(10) | 105.9(4)  | C(21)-C(20)-P(2) | 114.9(6) |
| C(10)-C(11) | 1.554(11) | C(14)-P(1)-Pt(1) | 115.6(3)  |                  |          |
| C(12)-C(13) | 1.511(11) | C(12)-P(1)-Pt(1) | 109.6(3)  |                  |          |

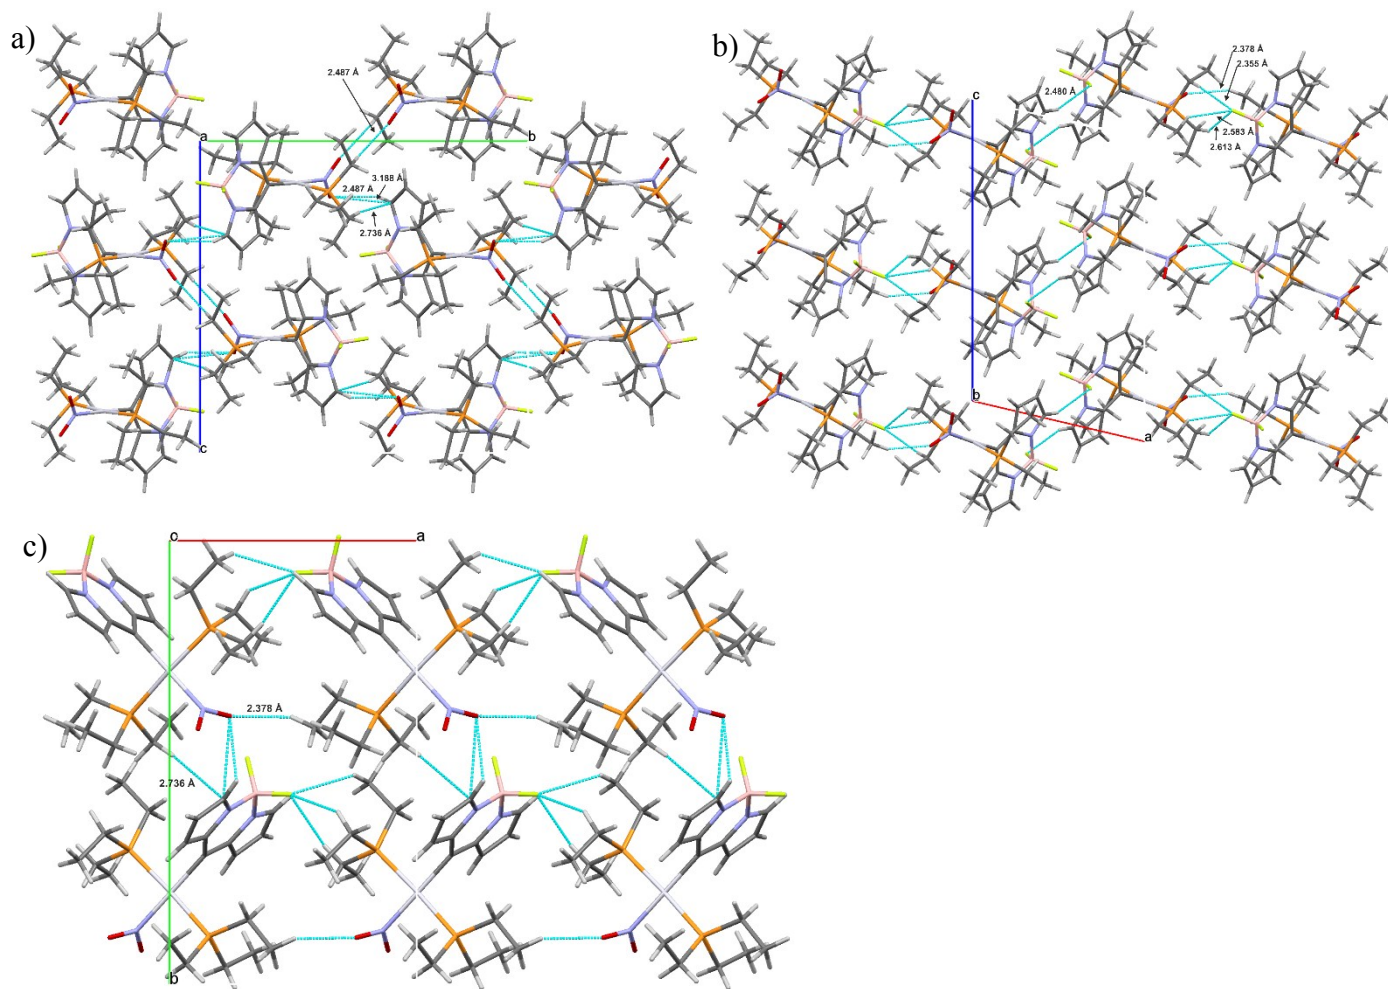

**Figure S27:** Packing of molecules of Pt-NO<sub>2</sub> along the crystallographic *a* (a), *b* (b), and *c* axis (c).

**Table S6: Bond lengths [Å] and angles [°] for Pt-CH<sub>3</sub>.**

|             |           |                   |            |                   |           |
|-------------|-----------|-------------------|------------|-------------------|-----------|
| Pt(1)-C(1)  | 2.039(11) | C(28)-C(29)       | 1.39(2)    | C(16)-P(2)-Pt(1)  | 114.4(4)  |
| Pt(1)-C(22) | 2.127(12) | C(29)-C(30)       | 1.40(2)    | C(20)-P(2)-Pt(1)  | 116.2(5)  |
| Pt(1)-P(2)  | 2.290(3)  | C(30)-C(31)       | 1.38(2)    | C(36)-P(3)-C(34)  | 102.8(6)  |
| Pt(1)-P(1)  | 2.299(3)  | C(32)-C(33)       | 1.529(16)  | C(36)-P(3)-C(32)  | 105.2(6)  |
| Pt(2)-C(23) | 2.053(12) | C(34)-C(35)       | 1.510(17)  | C(34)-P(3)-C(32)  | 104.4(7)  |
| Pt(2)-C(44) | 2.137(11) | C(36)-C(37)       | 1.52(2)    | C(36)-P(3)-Pt(2)  | 114.4(4)  |
| Pt(2)-P(4)  | 2.285(3)  | C(38)-C(39)       | 1.56(2)    | C(34)-P(3)-Pt(2)  | 113.9(4)  |
| Pt(2)-P(3)  | 2.304(3)  | C(40)-C(41)       | 1.40(3)    | C(32)-P(3)-Pt(2)  | 114.8(4)  |
| B(1)-F(1)   | 1.382(15) | C(42)-C(43)       | 1.55(3)    | C(38)-P(4)-C(42)  | 108.8(10) |
| B(1)-F(2)   | 1.411(17) | C(1)-Pt(1)-C(22)  | 177.6(4)   | C(38)-P(4)-C(40)  | 100.0(13) |
| B(1)-N(2)   | 1.53(2)   | C(1)-Pt(1)-P(2)   | 91.9(3)    | C(42)-P(4)-C(40)  | 104.0(11) |
| B(1)-N(1)   | 1.55(2)   | C(22)-Pt(1)-P(2)  | 90.5(3)    | C(38)-P(4)-Pt(2)  | 115.2(5)  |
| B(2)-F(3)   | 1.395(16) | C(1)-Pt(1)-P(1)   | 91.3(3)    | C(42)-P(4)-Pt(2)  | 116.9(6)  |
| B(2)-F(4)   | 1.403(15) | C(22)-Pt(1)-P(1)  | 86.3(3)    | C(40)-P(4)-Pt(2)  | 110.1(7)  |
| B(2)-N(3)   | 1.525(19) | P(2)-Pt(1)-P(1)   | 176.05(12) | C(6)-C(1)-C(2)    | 117.5(11) |
| B(2)-N(4)   | 1.54(2)   | C(23)-Pt(2)-C(44) | 177.2(5)   | C(6)-C(1)-Pt(1)   | 121.8(8)  |
| N(1)-C(5)   | 1.329(19) | C(23)-Pt(2)-P(4)  | 92.7(3)    | C(2)-C(1)-Pt(1)   | 120.2(9)  |
| N(1)-C(2)   | 1.398(15) | C(44)-Pt(2)-P(4)  | 89.9(3)    | C(3)-C(2)-N(1)    | 107.5(12) |
| N(2)-C(9)   | 1.33(2)   | C(23)-Pt(2)-P(3)  | 90.7(3)    | C(3)-C(2)-C(1)    | 129.9(12) |
| N(2)-C(6)   | 1.419(16) | C(44)-Pt(2)-P(3)  | 86.7(3)    | N(1)-C(2)-C(1)    | 122.2(12) |
| N(3)-C(27)  | 1.347(18) | P(4)-Pt(2)-P(3)   | 176.57(12) | C(2)-C(3)-C(4)    | 107.9(15) |
| N(3)-C(24)  | 1.402(14) | F(1)-B(1)-F(2)    | 108.3(11)  | C(5)-C(4)-C(3)    | 105.8(15) |
| N(4)-C(31)  | 1.342(18) | F(1)-B(1)-N(2)    | 111.4(13)  | N(1)-C(5)-C(4)    | 110.8(13) |
| N(4)-C(28)  | 1.405(16) | F(2)-B(1)-N(2)    | 109.5(12)  | C(7)-C(6)-C(1)    | 130.8(11) |
| P(1)-C(10)  | 1.830(12) | F(1)-B(1)-N(1)    | 111.6(13)  | C(7)-C(6)-N(2)    | 107.0(12) |
| P(1)-C(14)  | 1.832(13) | F(2)-B(1)-N(1)    | 108.9(12)  | C(1)-C(6)-N(2)    | 122.0(12) |
| P(1)-C(12)  | 1.842(13) | N(2)-B(1)-N(1)    | 107.1(11)  | C(8)-C(7)-C(6)    | 108.1(13) |
| P(2)-C(18)  | 1.830(14) | F(3)-B(2)-F(4)    | 108.5(10)  | C(9)-C(8)-C(7)    | 106.3(14) |
| P(2)-C(16)  | 1.831(13) | F(3)-B(2)-N(3)    | 109.6(13)  | N(2)-C(9)-C(8)    | 111.5(13) |
| P(2)-C(20)  | 1.831(15) | F(4)-B(2)-N(3)    | 109.9(10)  | C(11)-C(10)-P(1)  | 116.4(9)  |
| P(3)-C(36)  | 1.816(14) | F(3)-B(2)-N(4)    | 111.2(10)  | C(13)-C(12)-P(1)  | 115.2(9)  |
| P(3)-C(34)  | 1.818(12) | F(4)-B(2)-N(4)    | 110.9(13)  | C(15)-C(14)-P(1)  | 112.5(10) |
| P(3)-C(32)  | 1.833(11) | N(3)-B(2)-N(4)    | 106.6(10)  | C(17)-C(16)-P(2)  | 116.8(9)  |
| P(4)-C(38)  | 1.744(17) | C(5)-N(1)-C(2)    | 108.0(13)  | C(19)-C(18)-P(2)  | 114.6(9)  |
| P(4)-C(42)  | 1.824(16) | C(5)-N(1)-B(1)    | 127.5(12)  | C(21)-C(20)-P(2)  | 113.6(9)  |
| P(4)-C(40)  | 1.88(2)   | C(2)-N(1)-B(1)    | 124.3(11)  | C(24)-C(23)-C(28) | 116.8(11) |
| C(1)-C(6)   | 1.412(18) | C(9)-N(2)-C(6)    | 107.1(13)  | C(24)-C(23)-Pt(2) | 122.4(9)  |
| C(1)-C(2)   | 1.425(16) | C(9)-N(2)-B(1)    | 128.0(13)  | C(28)-C(23)-Pt(2) | 120.5(9)  |
| C(2)-C(3)   | 1.385(19) | C(6)-N(2)-B(1)    | 124.9(12)  | N(3)-C(24)-C(23)  | 123.3(12) |
| C(3)-C(4)   | 1.40(2)   | C(27)-N(3)-C(24)  | 107.9(11)  | N(3)-C(24)-C(25)  | 106.8(11) |
| C(4)-C(5)   | 1.39(3)   | C(27)-N(3)-B(2)   | 127.5(10)  | C(23)-C(24)-C(25) | 129.9(11) |

|             |           |                  |           |                   |           |
|-------------|-----------|------------------|-----------|-------------------|-----------|
| C(6)-C(7)   | 1.398(19) | C(24)-N(3)-B(2)  | 124.0(11) | C(26)-C(25)-C(24) | 108.4(11) |
| C(7)-C(8)   | 1.391(18) | C(31)-N(4)-C(28) | 107.9(12) | C(25)-C(26)-C(27) | 106.5(12) |
| C(8)-C(9)   | 1.38(2)   | C(31)-N(4)-B(2)  | 127.0(11) | N(3)-C(27)-C(26)  | 110.4(11) |
| C(10)-C(11) | 1.536(15) | C(28)-N(4)-B(2)  | 124.3(11) | C(29)-C(28)-N(4)  | 107.0(12) |
| C(12)-C(13) | 1.508(19) | C(10)-P(1)-C(14) | 105.7(6)  | C(29)-C(28)-C(23) | 130.5(12) |
| C(14)-C(15) | 1.53(2)   | C(10)-P(1)-C(12) | 105.9(7)  | N(4)-C(28)-C(23)  | 122.4(12) |
| C(16)-C(17) | 1.520(16) | C(14)-P(1)-C(12) | 102.4(7)  | C(28)-C(29)-C(30) | 108.1(14) |
| C(18)-C(19) | 1.517(17) | C(10)-P(1)-Pt(1) | 114.3(4)  | C(31)-C(30)-C(29) | 106.4(15) |
| C(20)-C(21) | 1.51(2)   | C(14)-P(1)-Pt(1) | 112.3(4)  | N(4)-C(31)-C(30)  | 110.6(13) |
| C(23)-C(24) | 1.404(17) | C(12)-P(1)-Pt(1) | 115.1(4)  | C(33)-C(32)-P(3)  | 116.7(9)  |
| C(23)-C(28) | 1.409(17) | C(18)-P(2)-C(16) | 103.4(7)  | C(35)-C(34)-P(3)  | 114.8(9)  |
| C(24)-C(25) | 1.405(17) | C(18)-P(2)-C(20) | 104.2(6)  | C(37)-C(36)-P(3)  | 114.1(12) |
| C(25)-C(26) | 1.384(17) | C(16)-P(2)-C(20) | 104.2(7)  | C(39)-C(38)-P(4)  | 117.6(12) |
| C(26)-C(27) | 1.39(2)   | C(18)-P(2)-Pt(1) | 113.0(4)  | C(41)-C(40)-P(4)  | 115.3(17) |
|             |           |                  |           | C(43)-C(42)-P(4)  | 110.9(13) |

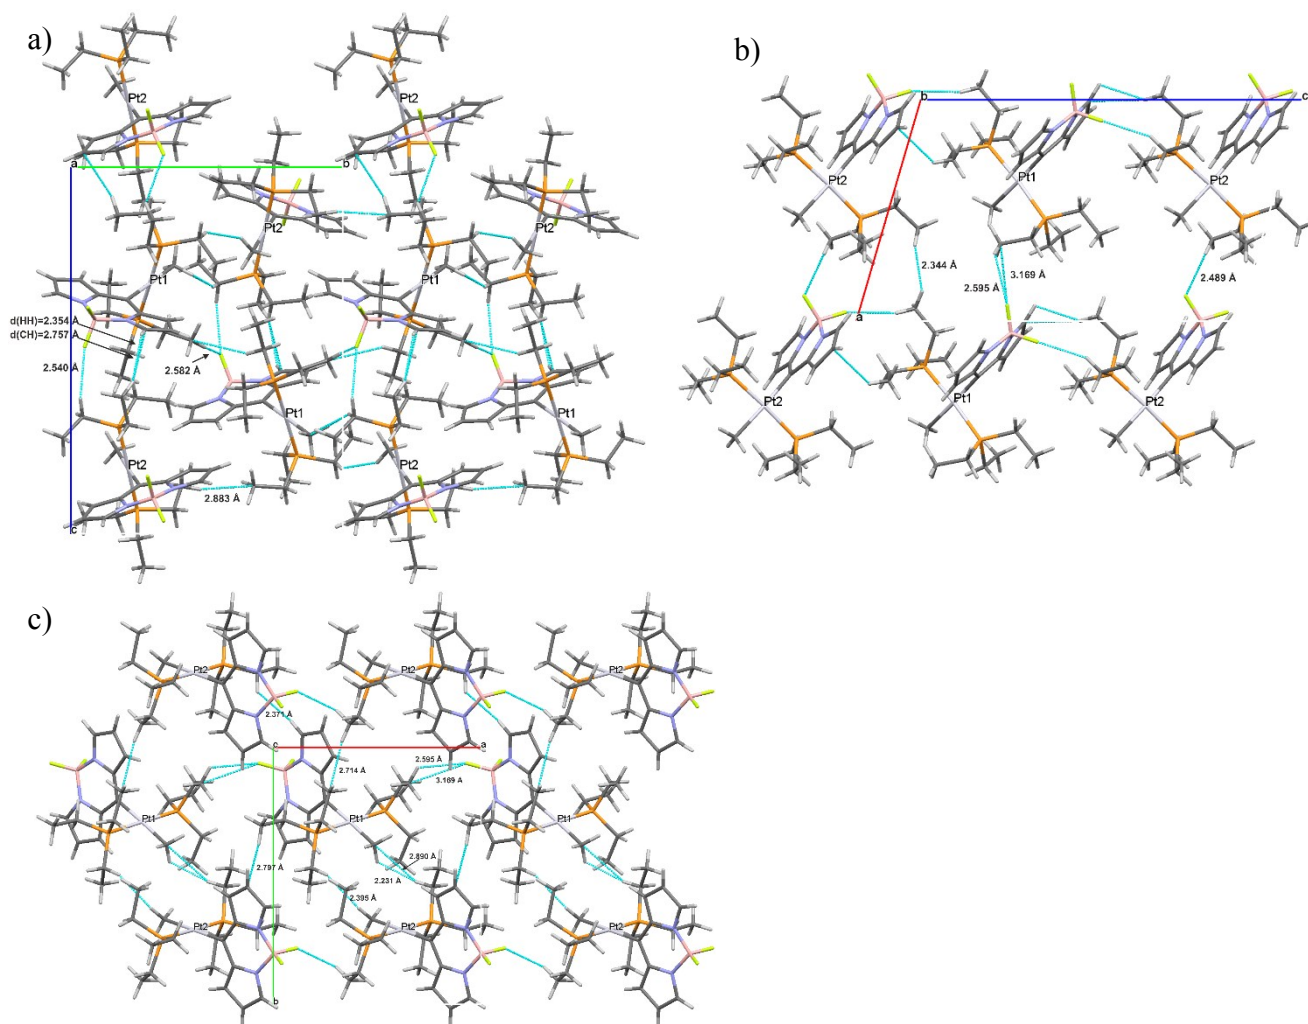

Figure S28: Packing of molecules of Pt-CH<sub>3</sub> along the crystallographic *a* (a), *b* (b), and *c* axis (c).



## DFT and TD-DFT calculations

**Table S7:** Atomic coordinates of Pt-Cl in the optimized ground state geometry.

| Atom | X        | Y        | Z        |
|------|----------|----------|----------|
| Pt   | 5.92902  | 9.33451  | 3.12565  |
| B    | 10.63911 | 10.54426 | 1.72252  |
| F    | 11.5403  | 10.26961 | 2.75179  |
| F    | 11.35508 | 11.04624 | 0.62428  |
| N    | 9.91030  | 9.26302  | 1.32638  |
| N    | 9.55581  | 11.54428 | 2.17879  |
| P    | 6.92251  | 8.88588  | 5.15589  |
| P    | 4.82302  | 9.77157  | 1.17428  |
| C    | 7.74125  | 9.88064  | 2.33088  |
| C    | 8.59559  | 8.95947  | 1.70483  |
| C    | 8.35976  | 7.62961  | 1.3193   |
| H    | 7.55369  | 7.14602  | 1.45724  |
| C    | 9.49963  | 7.14208  | 0.7074   |
| H    | 9.61975  | 6.27609  | 0.33425  |
| C    | 10.43536 | 8.16838  | 0.741    |
| H    | 11.3203  | 8.10793  | 0.40145  |
| C    | 8.23908  | 11.18685 | 2.51481  |
| C    | 7.63372  | 12.31828 | 3.05597  |
| H    | 6.73691  | 12.38004 | 3.36015  |
| C    | 8.58068  | 13.35115 | 3.07012  |
| H    | 8.44994  | 14.23685 | 3.38845  |
| C    | 9.73828  | 12.82552 | 2.53426  |
| H    | 10.55229 | 13.30385 | 2.42992  |
| C    | 8.69677  | 9.33661  | 5.25952  |
| H    | 9.17897  | 8.85697  | 4.53974  |
| H    | 8.77988  | 10.30509 | 5.07383  |
| C    | 9.40342  | 9.04357  | 6.58236  |
| H    | 10.3453  | 9.30901  | 6.51516  |
| H    | 9.34769  | 8.08428  | 6.7769   |
| H    | 8.97116  | 9.54818  | 7.30214  |
| C    | 6.87140  | 7.13157  | 5.63091  |
| H    | 7.33958  | 7.02644  | 6.49747  |
| H    | 5.92661  | 6.87006  | 5.76885  |
| C    | 7.49184  | 6.18542  | 4.6317   |
| H    | 7.47855  | 5.27476  | 4.99248  |
| H    | 8.41752  | 6.45481  | 4.45662  |
| H    | 6.98047  | 6.21302  | 3.7952   |
| C    | 6.13927  | 9.70981  | 6.57175  |
| H    | 5.24628  | 9.30770  | 6.71853  |
| H    | 6.68332  | 9.53635  | 7.37995  |
| C    | 5.97698  | 11.2105  | 6.40551  |
| H    | 5.61360  | 11.59422 | 7.2314   |
| H    | 5.36276  | 11.39185 | 5.66274  |
| H    | 6.84900  | 11.61393 | 6.21274  |
| C    | 5.82206  | 9.80311  | -0.25466 |
| H    | 6.53146  | 10.47855 | -0.11495 |
| H    | 6.26874  | 8.92136  | -0.33248 |
| C    | 5.12685  | 10.10535 | -1.61287 |
| H    | 5.73467  | 9.88327  | -2.34857 |
| H    | 4.90005  | 11.0607  | -1.65709 |
| H    | 4.30895  | 9.57446  | -1.68892 |
| C    | 4.19702  | 11.54691 | 1.17075  |
| H    | 4.97333  | 12.15533 | 1.11946  |
| H    | 3.65170  | 11.6862  | 0.35547  |
| C    | 3.42306  | 11.9096  | 2.28137  |
| H    | 3.04933  | 12.80449 | 2.13989  |

|    |         |          |          |
|----|---------|----------|----------|
| H  | 3.98693 | 11.91354 | 3.0825   |
| H  | 2.69422 | 11.26569 | 2.39809  |
| C  | 3.33292 | 8.77681  | 0.8312   |
| H  | 2.68522 | 8.88588  | 1.57043  |
| H  | 2.90597 | 9.10139  | -0.00177 |
| C  | 3.69357 | 7.27612  | 0.67557  |
| H  | 4.04707 | 6.93708  | 1.52445  |
| H  | 4.36986 | 7.17362  | -0.02476 |
| H  | 2.89036 | 6.77151  | 0.43151  |
| Cl | 4.07992 | 8.78863  | 4.0481   |

**Table S8:** Atomic coordinates of **Pt-Cl** in the optimized geometry of the first excited triplet state.

| Atom | X        | Y        | Z        |
|------|----------|----------|----------|
| Pt   | 0.95950  | 0.24470  | 0.02348  |
| B    | -3.93644 | -0.82976 | 0.01013  |
| F    | -4.69757 | 0.33577  | 0.07523  |
| F    | -4.76201 | -1.94281 | -0.03828 |
| N    | -3.0084  | -0.78449 | -1.22772 |
| N    | -2.98719 | -0.90666 | 1.23087  |
| P    | 0.39809  | 2.52047  | -0.02308 |
| P    | 1.62197  | -2.00746 | 0.06879  |
| C    | -0.94813 | -0.30095 | 0.01021  |
| C    | -1.66007 | -0.44774 | -1.20037 |
| C    | -1.21264 | -0.37971 | -2.53764 |
| H    | -0.19617 | -0.15600 | -2.83458 |
| C    | -2.2959  | -0.67873 | -3.35823 |
| H    | -2.3119  | -0.73154 | -4.43854 |
| C    | -3.38391 | -0.91743 | -2.50724 |
| H    | -4.40556 | -1.17288 | -2.758   |
| C    | -1.6387  | -0.56881 | 1.21424  |
| C    | -1.17168 | -0.62553 | 2.54555  |
| H    | -0.15238 | -0.42481 | 2.84987  |
| C    | -2.24329 | -0.99895 | 3.35125  |
| H    | -2.24357 | -1.14963 | 4.42238  |
| C    | -3.34372 | -1.15752 | 2.49833  |
| H    | -4.36197 | -1.43483 | 2.73957  |
| C    | -1.39745 | 2.90296  | -0.15218 |
| H    | -1.75164 | 2.42733  | -1.07383 |
| H    | -1.89056 | 2.36456  | 0.66604  |
| C    | -1.77069 | 4.38169  | -0.12808 |
| H    | -2.85745 | 4.48890  | -0.21065 |
| H    | -1.32277 | 4.93169  | -0.96203 |
| H    | -1.46238 | 4.86750  | 0.80352  |
| C    | 1.20545  | 3.42729  | -1.40459 |
| H    | 0.92789  | 4.48522  | -1.31988 |
| H    | 2.28133  | 3.35528  | -1.21078 |
| C    | 0.88000  | 2.88413  | -2.79073 |
| H    | 1.37285  | 3.49083  | -3.55781 |
| H    | -0.1956  | 2.89626  | -2.9976  |
| H    | 1.23478  | 1.85395  | -2.89714 |
| C    | 0.99674  | 3.42985  | 1.45931  |
| H    | 2.07727  | 3.25088  | 1.49353  |
| H    | 0.84931  | 4.50255  | 1.28162  |
| C    | 0.33956  | 2.99753  | 2.76486  |
| H    | 0.76592  | 3.55640  | 3.6045   |
| H    | 0.49991  | 1.93121  | 2.95233  |
| H    | -0.74064 | 3.17876  | 2.75982  |
| C    | 0.38250  | -3.1894  | -0.61114 |
| H    | -0.51488 | -3.08011 | 0.00988  |
| H    | 0.10341  | -2.81818 | -1.60377 |

|    |          |          |          |
|----|----------|----------|----------|
| C  | 0.81391  | -4.65102 | -0.68303 |
| H  | -0.00557 | -5.25657 | -1.08458 |
| H  | 1.06757  | -5.05539 | 0.30205  |
| H  | 1.67786  | -4.79108 | -1.3409  |
| C  | 1.95312  | -2.63971 | 1.76614  |
| H  | 0.98502  | -2.65366 | 2.28197  |
| H  | 2.28378  | -3.6818  | 1.67764  |
| C  | 2.96868  | -1.82083 | 2.5559   |
| H  | 3.07115  | -2.2275  | 3.56764  |
| H  | 2.66102  | -0.77325 | 2.63194  |
| H  | 3.95708  | -1.83993 | 2.08605  |
| C  | 3.16557  | -2.33512 | -0.87171 |
| H  | 3.93885  | -1.70298 | -0.42469 |
| H  | 3.45187  | -3.38056 | -0.70335 |
| C  | 3.03345  | -2.02831 | -2.35975 |
| H  | 2.74042  | -0.98438 | -2.51505 |
| H  | 2.28954  | -2.6687  | -2.84636 |
| H  | 3.99123  | -2.18934 | -2.86556 |
| Cl | 3.28199  | 0.97402  | 0.07211  |

**Table S9:** Atomic coordinates of **Pt-I** in the optimized ground state geometry.

| Atom | X        | Y        | Z        |
|------|----------|----------|----------|
| Pt   | 1.06754  | 0.27428  | 0.0463   |
| B    | -3.92647 | -0.84735 | -0.02201 |
| F    | -4.76401 | 0.26602  | 0.0524   |
| F    | -4.68793 | -2.00788 | -0.09856 |
| N    | -2.99214 | -0.72936 | -1.2476  |
| N    | -2.99147 | -0.89104 | 1.20866  |
| P    | 0.59145  | 2.54162  | 0.01073  |
| P    | 1.70935  | -1.96283 | 0.05867  |
| C    | -0.9255  | -0.26361 | 0.01567  |
| C    | -1.64331 | -0.3908  | -1.19661 |
| C    | -1.18745 | -0.2869  | -2.52817 |
| H    | -0.16839 | -0.05073 | -2.80748 |
| C    | -2.26311 | -0.56543 | -3.36853 |
| H    | -2.27058 | -0.58717 | -4.45025 |
| C    | -3.35677 | -0.82975 | -2.53441 |
| H    | -4.37493 | -1.08318 | -2.80172 |
| C    | -1.6423  | -0.54857 | 1.20228  |
| C    | -1.18911 | -0.61125 | 2.53767  |
| H    | -0.17241 | -0.40585 | 2.84849  |
| C    | -2.26633 | -0.99175 | 3.33502  |
| H    | -2.27623 | -1.14601 | 4.40585  |
| C    | -3.35814 | -1.15029 | 2.47252  |
| H    | -4.37678 | -1.43469 | 2.70461  |
| C    | -1.18965 | 2.98266  | -0.16228 |
| H    | -1.54618 | 2.47591  | -1.06629 |
| H    | -1.70511 | 2.48756  | 0.66942  |
| C    | -1.52821 | 4.46878  | -0.20315 |
| H    | -2.61138 | 4.60018  | -0.30006 |
| H    | -1.06001 | 4.97218  | -1.05553 |
| H    | -1.21581 | 4.98747  | 0.70939  |
| C    | 1.44011  | 3.45200  | -1.34833 |
| H    | 1.21693  | 4.52014  | -1.23735 |
| H    | 2.51546  | 3.33133  | -1.17588 |
| C    | 1.07489  | 2.96128  | -2.74472 |
| H    | 1.61665  | 3.53646  | -3.50328 |
| H    | 0.00403  | 3.06751  | -2.94938 |
| H    | 1.33834  | 1.90565  | -2.86713 |
| C    | 1.15217  | 3.46067  | 1.508    |
| H    | 2.23285  | 3.29650  | 1.58595  |

|   |          |          |          |
|---|----------|----------|----------|
| H | 1.00651  | 4.53292  | 1.32696  |
| C | 0.45921  | 3.02758  | 2.79513  |
| H | 0.86535  | 3.57987  | 3.6493   |
| H | 0.60647  | 1.95874  | 2.98049  |
| H | -0.61923 | 3.21591  | 2.76154  |
| C | 0.47902  | -3.12528 | -0.67555 |
| H | -0.43274 | -3.0113  | -0.07666 |
| H | 0.22894  | -2.73184 | -1.66751 |
| C | 0.88845  | -4.59206 | -0.7627  |
| H | 0.07304  | -5.17843 | -1.2001  |
| H | 1.10596  | -5.01859 | 0.22183  |
| H | 1.77038  | -4.73514 | -1.39593 |
| C | 1.98051  | -2.65265 | 1.74831  |
| H | 0.99041  | -2.69248 | 2.21945  |
| H | 2.32776  | -3.68783 | 1.64403  |
| C | 2.94331  | -1.85051 | 2.61661  |
| H | 3.01349  | -2.29799 | 3.61396  |
| H | 2.60357  | -0.81552 | 2.72584  |
| H | 3.95291  | -1.82889 | 2.19242  |
| C | 3.27063  | -2.32873 | -0.84685 |
| H | 4.05350  | -1.70797 | -0.3999  |
| H | 3.54396  | -3.37462 | -0.66177 |
| C | 3.16613  | -2.04679 | -2.34258 |
| H | 2.84413  | -1.01559 | -2.52395 |
| H | 2.44932  | -2.71453 | -2.83272 |
| H | 4.13751  | -2.18981 | -2.82785 |
| I | 3.12137  | 0.82342  | 0.06675  |

**Table S10:** Atomic coordinates of **Pt-I** in the optimized geometry of the first excited triplet state.

| Atom | X        | Y        | Z        |
|------|----------|----------|----------|
| Pt   | 0.63375  | 0.02754  | -0.00791 |
| B    | -4.39671 | -0.09788 | 0.01699  |
| F    | -4.99919 | 1.15626  | 0.07064  |
| F    | -5.36201 | -1.09322 | -0.01834 |
| N    | -3.47515 | -0.18918 | -1.22405 |
| N    | -3.46381 | -0.28785 | 1.23867  |
| P    | 0.51701  | 2.37608  | -0.04291 |
| P    | 0.73844  | -2.32765 | 0.08287  |
| C    | -1.35595 | -0.10193 | 0.00213  |
| C    | -2.08733 | -0.10831 | -1.20348 |
| C    | -1.64162 | -0.10742 | -2.54321 |
| H    | -0.60269 | -0.06273 | -2.84322 |
| C    | -2.76511 | -0.19103 | -3.35891 |
| H    | -2.79687 | -0.22311 | -4.43962 |
| C    | -3.87422 | -0.23704 | -2.50218 |
| H    | -4.9264  | -0.29912 | -2.74922 |
| C    | -2.07547 | -0.20878 | 1.21214  |
| C    | -1.61994 | -0.30847 | 2.54493  |
| H    | -0.5799  | -0.28378 | 2.84266  |
| C    | -2.73721 | -0.45017 | 3.3616   |
| H    | -2.75978 | -0.5612  | 4.43729  |
| C    | -3.8527  | -0.42996 | 2.51321  |
| H    | -4.90301 | -0.5083  | 2.76344  |
| C    | -1.19062 | 3.06892  | -0.10576 |
| H    | -1.63098 | 2.71537  | -1.04548 |
| H    | -1.76274 | 2.57917  | 0.69058  |
| C    | -1.31016 | 4.58561  | 0.00571  |
| H    | -2.36263 | 4.87608  | -0.08037 |
| H    | -0.76249 | 5.10454  | -0.78763 |
| H    | -0.94634 | 4.95626  | 0.96932  |
| C    | 1.39815  | 3.15596  | -1.45949 |

|   |          |          |          |
|---|----------|----------|----------|
| H | 1.25759  | 4.24089  | -1.3794  |
| H | 2.46244  | 2.95428  | -1.2958  |
| C | 0.97142  | 2.64736  | -2.83087 |
| H | 1.51199  | 3.18688  | -3.6158  |
| H | -0.10014 | 2.78668  | -3.00976 |
| H | 1.19904  | 1.58163  | -2.93743 |
| C | 1.31357  | 3.17907  | 1.40883  |
| H | 2.37367  | 2.90699  | 1.35673  |
| H | 1.25018  | 4.26452  | 1.26334  |
| C | 0.72577  | 2.76902  | 2.7534   |
| H | 1.23340  | 3.30175  | 3.56444  |
| H | 0.85484  | 1.69528  | 2.92279  |
| H | -0.3436  | 2.99611  | 2.82369  |
| C | -0.73881 | -3.17736 | -0.62474 |
| H | -1.59662 | -2.84192 | -0.03047 |
| H | -0.89303 | -2.76639 | -1.62862 |
| C | -0.68673 | -4.70172 | -0.67007 |
| H | -1.63327 | -5.08702 | -1.06408 |
| H | -0.54306 | -5.14123 | 0.3221   |
| H | 0.11203  | -5.06704 | -1.32331 |
| C | 0.80964  | -2.96544 | 1.81069  |
| H | -0.1631  | -2.73314 | 2.26127  |
| H | 0.88511  | -4.05836 | 1.75743  |
| C | 1.93994  | -2.39532 | 2.66045  |
| H | 1.90293  | -2.82691 | 3.66646  |
| H | 1.86199  | -1.30707 | 2.74947  |
| H | 2.92354  | -2.61979 | 2.23541  |
| C | 2.16174  | -3.12295 | -0.76771 |
| H | 3.07148  | -2.73963 | -0.29612 |
| H | 2.11075  | -4.19799 | -0.55591 |
| C | 2.19338  | -2.85732 | -2.26863 |
| H | 2.25547  | -1.78291 | -2.47132 |
| H | 1.30475  | -3.25168 | -2.77367 |
| H | 3.06996  | -3.33592 | -2.71776 |
| I | 3.39136  | 0.25810  | 0.00283  |

**Table S11:** Atomic coordinates of Pt-NCS in the optimized ground state geometry.

| Atom | X       | Y        | Z        |
|------|---------|----------|----------|
| C    | 4.26823 | 12.6649  | 9.25673  |
| C    | 4.70155 | 12.0705  | 8.0611   |
| C    | 4.37516 | 12.34873 | 6.71523  |
| H    | 3.77940 | 13.02262 | 6.41163  |
| C    | 5.07285 | 11.47067 | 5.92024  |
| H    | 5.05374 | 11.43093 | 4.97187  |
| C    | 5.81218 | 10.64863 | 6.77001  |
| H    | 6.38504 | 9.94402  | 6.48675  |
| C    | 4.76673 | 12.14638 | 10.4727  |
| C    | 4.48827 | 12.51494 | 11.80448 |
| H    | 3.90028 | 13.2051  | 12.08461 |
| C    | 5.23138 | 11.68025 | 12.63547 |
| H    | 5.24542 | 11.6929  | 13.5854  |
| C    | 5.94935 | 10.82388 | 11.80448 |
| H    | 6.54737 | 10.14998 | 12.10651 |
| C    | 1.47628 | 10.93047 | 8.74968  |
| H    | 0.63337 | 10.49687 | 8.35688  |
| H    | 2.21596 | 10.93047 | 7.98129  |
| C    | 1.81045 | 10.1554  | 9.99382  |
| H    | 2.12717 | 9.26109  | 9.74656  |
| H    | 1.01020 | 10.07591 | 10.55251 |
| H    | 2.51189 | 10.62334 | 10.49148 |
| C    | 0.43959 | 13.21594 | 7.19098  |

|   |          |          |          |
|---|----------|----------|----------|
| H | 0.27302  | 14.19155 | 7.1722   |
| H | 1.11104  | 13.00997 | 6.49301  |
| C | -0.78086 | 12.52578 | 6.88895  |
| H | -0.59546 | 11.57004 | 6.77314  |
| H | -1.16519 | 12.88712 | 6.06421  |
| H | -1.41628 | 12.64683 | 7.62604  |
| C | -0.14703 | 13.04069 | 10.11432 |
| H | -0.6026  | 13.86092 | 9.79664  |
| H | -0.79591 | 12.29633 | 10.04077 |
| C | 0.17818  | 13.22316 | 11.54313 |
| H | 0.69099  | 12.45171 | 11.86395 |
| H | -0.6517  | 13.30085 | 12.05957 |
| H | 0.70866  | 14.03979 | 11.65581 |
| C | 6.24660  | 15.27737 | 8.61353  |
| H | 6.40971  | 14.25478 | 8.87331  |
| H | 6.82847  | 15.8266  | 8.92026  |
| C | 6.17366  | 15.42552 | 7.09708  |
| H | 7.00868  | 15.10573 | 6.69802  |
| H | 6.04333  | 16.36861 | 6.86704  |
| H | 5.42339  | 14.89797 | 6.75279  |
| C | 5.22253  | 15.90791 | 11.20666 |
| H | 5.51363  | 15.04973 | 11.47114 |
| H | 6.02432  | 16.51315 | 11.18945 |
| C | 4.10917  | 16.39752 | 12.11747 |
| H | 4.43823  | 16.4463  | 13.03923 |
| H | 3.35307  | 15.77602 | 12.07209 |
| H | 3.81782  | 17.28822 | 11.82795 |
| C | 4.26266  | 17.38216 | 8.89522  |
| H | 4.06239  | 17.3370  | 7.92651  |
| H | 3.43625  | 17.66943 | 9.35688  |
| C | 5.33804  | 18.4445  | 9.11901  |
| H | 5.47382  | 18.57458 | 10.0799  |
| H | 5.05317  | 19.28822 | 8.71056  |
| H | 6.17808  | 18.15001 | 8.70743  |
| C | 0.76172  | 16.37222 | 9.85767  |
| B | 6.18960  | 10.30355 | 9.29116  |
| F | 5.77480  | 8.97907  | 9.34765  |
| F | 7.58340  | 10.33607 | 9.25344  |
| S | -0.38317 | 17.36789 | 10.43577 |
| N | 5.59468  | 10.99895 | 8.04545  |
| N | 5.67604  | 11.08874 | 10.51182 |
| N | 1.58219  | 15.6640  | 9.43826  |
| P | 1.19226  | 12.70302 | 9.01431  |

**Table S12:** Atomic coordinates of Pt-NCS in the optimized geometry of the first excited triplet state.

| Atom | X       | Y        | Z        |
|------|---------|----------|----------|
| C    | 1.27376 | -0.17925 | -0.00132 |
| C    | 2.01624 | -0.43795 | -1.17591 |
| C    | 1.58514 | -0.75642 | -2.48293 |
| H    | 0.55022 | -0.80128 | -2.79793 |
| C    | 2.7189  | -1.00632 | -3.24985 |
| H    | 2.76111 | -1.293   | -4.29194 |
| C    | 3.81994 | -0.82241 | -2.40162 |
| H    | 4.8763  | -0.90709 | -2.62222 |
| C    | 1.989   | -0.06788 | 1.21229  |
| C    | 1.52718 | 0.00243  | 2.54583  |
| H    | 0.48455 | 0.01753  | 2.83781  |
| C    | 2.64327 | -0.00575 | 3.37679  |
| H    | 2.66163 | 0.01817  | 4.45799  |
| C    | 3.76399 | -0.06936 | 2.53621  |
| H    | 4.81486 | -0.08061 | 2.79566  |

|   |          |          |          |
|---|----------|----------|----------|
| C | 0.29372  | -3.45231 | 0.0926   |
| H | -0.04377 | -4.42133 | -0.29415 |
| H | 1.0766   | -3.09363 | -0.58542 |
| C | 0.84153  | -3.6208  | 1.50623  |
| H | 1.71313  | -4.28334 | 1.48449  |
| H | 0.10162  | -4.07445 | 2.17345  |
| H | 1.15757  | -2.66694 | 1.93802  |
| C | -1.86831 | -2.73684 | -1.70859 |
| H | -2.63117 | -1.9763  | -1.91004 |
| H | -1.08371 | -2.59842 | -2.46233 |
| C | -2.46793 | -4.13697 | -1.80918 |
| H | -1.72528 | -4.9215  | -1.63269 |
| H | -2.87178 | -4.28998 | -2.81555 |
| H | -3.28943 | -4.27885 | -1.10021 |
| C | -2.37449 | -2.77487 | 1.16575  |
| H | -3.34904 | -2.51817 | 0.73395  |
| H | -2.34412 | -3.86747 | 1.26133  |
| C | -2.22202 | -2.09766 | 2.52512  |
| H | -1.25627 | -2.31536 | 2.99057  |
| H | -3.00804 | -2.44483 | 3.20437  |
| H | -2.31373 | -1.01141 | 2.42565  |
| C | 1.0394   | 3.02079  | -0.97483 |
| H | 1.92294  | 2.48569  | -0.60704 |
| H | 1.16554  | 4.07204  | -0.68742 |
| C | 0.9243   | 2.88527  | -2.48958 |
| H | 1.83913  | 3.25182  | -2.96644 |
| H | 0.08666  | 3.46722  | -2.88802 |
| H | 0.78958  | 1.84072  | -2.78674 |
| C | -0.16095 | 3.02653  | 1.64635  |
| H | 0.75583  | 2.5554   | 2.01971  |
| H | 0.04269  | 4.10165  | 1.56664  |
| C | -1.32559 | 2.76092  | 2.59448  |
| H | -1.08464 | 3.12824  | 3.59736  |
| H | -1.54441 | 1.69022  | 2.66937  |
| H | -2.24013 | 3.26661  | 2.26737  |
| C | -1.86911 | 3.26805  | -0.72824 |
| H | -2.02462 | 2.89037  | -1.74561 |
| H | -2.73686 | 2.93001  | -0.15241 |
| C | -1.76574 | 4.78992  | -0.71817 |
| H | -1.6543  | 5.18477  | 0.29684  |
| H | -2.67856 | 5.22351  | -1.1401  |
| H | -0.92291 | 5.1508   | -1.31662 |
| C | -3.92425 | 0.31156  | -0.17255 |
| B | 4.27787  | 0.01136  | 0.00266  |
| F | 5.42218  | -0.75445 | 0.13538  |
| F | 4.59866  | 1.35444  | -0.20356 |
| S | -5.54863 | 0.40471  | -0.21345 |
| N | 3.40476  | -0.49207 | -1.17154 |
| N | 3.37724  | -0.11295 | 1.25479  |
| N | -2.74828 | 0.24965  | -0.14301 |
| P | -1.11607 | -2.28152 | -0.08741 |

**Table S13:** Atomic coordinates of **Pt-NO<sub>2</sub>** in the optimized ground state geometry.

| Atom | X        | Y       | Z        |
|------|----------|---------|----------|
| Pt   | -2.41755 | 3.46964 | 10.11004 |
| B    | -5.7657  | 7.23402 | 10.30933 |
| F    | -7.1456  | 7.19532 | 10.53432 |
| F    | -5.39204 | 8.55633 | 10.1019  |
| N    | -5.01526 | 6.63006 | 11.50286 |
| N    | -5.40506 | 6.37939 | 9.06953  |
| N    | -1.02448 | 2.01711 | 9.94872  |

---

|   |          |          |          |
|---|----------|----------|----------|
| O | -0.19774 | 1.75467  | 10.82472 |
| O | -0.97804 | 1.27352  | 8.89242  |
| P | -4.00439 | 1.81978  | 10.54182 |
| P | -0.74985 | 5.08938  | 9.91362  |
| C | -3.75578 | 4.8939   | 10.20721 |
| C | -4.06897 | 5.57524  | 11.43744 |
| C | -3.60533 | 5.37168  | 12.74266 |
| H | -2.96894 | 4.71893  | 13.01073 |
| C | -4.22463 | 6.27004  | 13.5676  |
| H | -4.0836  | 6.36762  | 14.50104 |
| C | -5.09458 | 7.01027  | 12.78574 |
| H | -5.6688  | 7.69329  | 13.11444 |
| C | -4.43851 | 5.35486  | 9.06953  |
| C | -4.34366 | 4.89894  | 7.72442  |
| H | -3.77798 | 4.20414  | 7.41168  |
| C | -5.22301 | 5.64758  | 6.94576  |
| H | -5.36522 | 5.56346  | 6.00912  |
| C | -5.85304 | 6.53922  | 7.8042   |
| H | -6.50845 | 7.17345  | 7.53933  |
| C | -5.65029 | 2.44274  | 11.04013 |
| H | -5.53888 | 3.06184  | 11.80443 |
| H | -6.03493 | 2.95922  | 10.28859 |
| C | -6.65466 | 1.32736  | 11.44382 |
| H | -7.54992 | 1.71429  | 11.54594 |
| H | -6.3736  | 0.92696  | 12.2927  |
| H | -6.67539 | 0.6376   | 10.74813 |
| C | -3.43132 | 0.76546  | 11.91772 |
| H | -4.13331 | 0.09926  | 12.12675 |
| H | -2.62254 | 0.27254  | 11.63051 |
| C | -3.10981 | 1.54942  | 13.16869 |
| H | -2.79939 | 0.93706  | 13.86758 |
| H | -3.91421 | 2.01711  | 13.47824 |
| H | -2.40793 | 2.20553  | 12.97243 |
| C | -4.31331 | 0.64938  | 9.17963  |
| H | -3.43903 | 0.34824  | 8.82221  |
| H | -4.77377 | -0.14468 | 9.54822  |
| C | -5.1379  | 1.18772  | 8.02759  |
| H | -5.27708 | 0.47946  | 7.36541  |
| H | -4.66489 | 1.93804  | 7.60954  |
| H | -6.00502 | 1.49559  | 8.36267  |
| C | -1.29443 | 6.56613  | 9.0073   |
| H | -1.65703 | 6.27845  | 8.1329   |
| H | -2.03613 | 6.98503  | 9.51312  |
| C | -0.20802 | 7.6361   | 8.75839  |
| H | -0.607   | 8.4066   | 8.30204  |
| H | 0.50214  | 7.25757  | 8.19832  |
| H | 0.17022  | 7.92377  | 9.61524  |
| C | 0.75996  | 4.52547  | 9.0807   |
| H | 1.44243  | 5.24046  | 9.13974  |
| H | 1.11176  | 3.73309  | 9.55779  |
| C | 0.55313  | 4.16377  | 7.61113  |
| H | 1.41346  | 3.91646  | 7.21063  |
| H | 0.18018  | 4.93427  | 7.13404  |
| H | -0.06629 | 3.40672  | 7.54571  |
| C | -0.16403 | 5.7031   | 11.53477 |
| H | 0.3843   | 6.51398  | 11.38638 |
| H | -0.95071 | 5.96891  | 12.0725  |
| C | 0.65587  | 4.70548  | 12.33737 |
| H | 0.85272  | 5.08064  | 13.22135 |

---



**Table S14:** Atomic coordinates of **Pt-NO<sub>2</sub>** in the optimized geometry of the first excited triplet state.

| Atom | X        | Y        | Z        |
|------|----------|----------|----------|
| Pt   | -0.93063 | 0.04278  | -0.01087 |
| B    | 4.12903  | -0.24379 | -0.00969 |
| F    | 5.07467  | 0.77316  | 0.00665  |
| F    | 4.76069  | -1.48359 | -0.03238 |
| N    | 3.20431  | -0.14217 | 1.22899  |
| N    | 3.19833  | -0.10007 | -1.23896 |
| N    | -3.02118 | 0.13693  | -0.05396 |
| O    | -3.66739 | 0.09495  | 0.99615  |
| O    | -3.6016  | 0.24417  | -1.13809 |
| P    | -0.9472  | 2.39103  | -0.03878 |
| P    | -1.00741 | -2.30186 | 0.11043  |
| C    | 1.08094  | -0.03997 | 0.002    |
| C    | 1.81471  | -0.08919 | 1.20579  |
| C    | 1.36986  | -0.0686  | 2.54629  |
| H    | 0.33156  | -0.02283 | 2.84755  |
| C    | 2.49423  | -0.10672 | 3.36401  |
| H    | 2.52694  | -0.09993 | 4.44513  |
| C    | 3.60352  | -0.15203 | 2.50819  |
| H    | 4.65624  | -0.19159 | 2.75769  |
| C    | 1.80928  | -0.04398 | -1.20569 |
| C    | 1.35514  | 0.00906  | -2.54179 |
| H    | 0.31422  | 0.05828  | -2.83345 |
| C    | 2.47388  | -0.01168 | -3.36774 |
| H    | 2.49936  | 0.02017  | -4.44864 |
| C    | 3.58899  | -0.07992 | -2.52086 |
| H    | 4.63992  | -0.11547 | -2.77849 |
| C    | 0.70285  | 3.20299  | -0.03392 |
| H    | 1.24013  | 2.80919  | 0.83679  |
| H    | 1.24063  | 2.82239  | -0.91004 |
| C    | 0.69052  | 4.72787  | -0.02211 |
| H    | 1.71899  | 5.10371  | -0.01606 |
| H    | 0.18984  | 5.1271   | 0.86586  |
| H    | 0.19553  | 5.14086  | -0.90684 |
| C    | -1.86765 | 3.08996  | 1.39401  |
| H    | -1.9505  | 4.17339  | 1.24286  |
| H    | -2.88117 | 2.67746  | 1.32873  |
| C    | -1.26043 | 2.7731   | 2.75522  |
| H    | -1.86262 | 3.22813  | 3.54842  |
| H    | -0.23927 | 3.15716  | 2.85162  |
| H    | -1.23571 | 1.69335  | 2.93051  |
| C    | -1.86573 | 3.09956  | -1.46721 |
| H    | -2.88994 | 2.71946  | -1.38179 |
| H    | -1.91037 | 4.18653  | -1.32604 |
| C    | -1.29191 | 2.74724  | -2.83396 |
| H    | -1.87518 | 3.23656  | -3.62094 |
| H    | -1.33597 | 1.66804  | -3.00689 |
| H    | -0.25073 | 3.06919  | -2.94312 |
| C    | 0.37015  | -3.15755 | -0.76194 |
| H    | 0.40671  | -2.74984 | -1.77858 |
| H    | 1.29212  | -2.821   | -0.27353 |
| C    | 0.30142  | -4.68156 | -0.78803 |
| H    | 1.18113  | -5.07828 | -1.3056  |
| H    | -0.584   | -5.04425 | -1.3199  |
| H    | 0.29273  | -5.11053 | 0.21891  |
| C    | -2.54717 | -3.05321 | -0.56078 |
| H    | -2.54329 | -4.11559 | -0.28612 |
| H    | -3.38827 | -2.59151 | -0.03222 |
| C    | -2.70389 | -2.87676 | -2.06856 |
| H    | -3.64438 | -3.32881 | -2.4004  |
| H    | -1.89143 | -3.3598  | -2.62184 |

---

|   |          |          |          |
|---|----------|----------|----------|
| H | -2.72732 | -1.81676 | -2.33745 |
| C | -0.89819 | -2.9136  | 1.8421   |
| H | -0.91024 | -4.00999 | 1.81151  |
| H | 0.08986  | -2.61253 | 2.21065  |
| C | -1.99451 | -2.38924 | 2.76372  |
| H | -1.82816 | -2.75285 | 3.78319  |

---

**Table S15:** Selected bond lengths and bond angles of the calculated structures of **Pt-Cl**, **Pt-I**, **Pt-NCS**, and **Pt-NO<sub>2</sub>** in comparison with the structure data from X-ray crystal structure analysis.

|                             |                | <b>Pt-Cl</b> |            | <b>Pt-I</b>  | <b>Pt-NCS</b> | <b>Pt-NO<sub>2</sub></b> |
|-----------------------------|----------------|--------------|------------|--------------|---------------|--------------------------|
|                             |                | molecule 1   | molecule 2 |              |               |                          |
| bond lengths / Å            |                |              |            |              |               |                          |
| <b>C1-Pt1</b>               | X-ray          | 1.976(7)     | 1.971(8)   | 1.994(10)    | 1.984(4)      | 1.956(9) <sup>c</sup>    |
|                             | S <sub>0</sub> | 1.984        | -          | 1.994        | 1.989         | 2.013                    |
|                             | T <sub>1</sub> | 2.013        | -          | 2.021        | 2.017         | 2.038                    |
| <b>X1-Pt1<sup>a</sup></b>   | X-ray          | 2.3750(19)   | 2.385(2)   | 2.6689(8)    | 2.048(4)      | 2.019(8)                 |
|                             | S <sub>0</sub> | 2.435        | -          | 2.767        | 2.058         | 2.093                    |
|                             | T <sub>1</sub> | 2.443        | -          | 2.773        | 2.060         | 2.087                    |
| <b>P1-Pt1</b>               | X-ray          | 2.319(2)     | 2.316(2)   | 2.3206(15)   | 2.3135(13)    | 2.329(2)                 |
|                             | S <sub>0</sub> | 2.348        | -          | 2.352        | 2.349         | 2.348                    |
|                             | T <sub>1</sub> | 2.339        | -          | 2.350        | 2.342         | 2.342                    |
| <b>P2-Pt1</b>               | X-ray          | 2.309(2)     | 2.310(2)   | <sup>b</sup> | 2.3249(11)    | 2.334(2)                 |
|                             | S <sub>0</sub> | 2.344        | -          | 2.359        | 2.356         | 2.349                    |
|                             | T <sub>1</sub> | 2.336        | -          | 2.345        | 2.347         | 2.345                    |
| bond angles / deg           |                |              |            |              |               |                          |
| <b>C1-Pt1-P1</b>            | X-ray          | 91.2(2)      | 91.6(2)    | 91.37(7)     | 91.44(12)     | 92.3(3) <sup>c</sup>     |
|                             | S <sub>0</sub> | 90.4         | -          | 88.8         | 94.1          | 92.8                     |
|                             | T <sub>1</sub> | 89.7         | -          | 88.2         | 93.8          | 91.9                     |
| <b>C1-Pt1-P2</b>            | X-ray          | 94.0(2)      | 93.0(2)    | <sup>b</sup> | 90.79(12)     | 89.3(3) <sup>c</sup>     |
|                             | S <sub>0</sub> | 92.1         | -          | 90.9         | 89.0          | 89.5                     |
|                             | T <sub>1</sub> | 91.4         | -          | 90.1         | 88.1          | 88.1                     |
| <b>P1-Pt1-X<sup>a</sup></b> | X-ray          | 87.13(7)     | 87.68(8)   | 88.71(7)     | 87.28(12)     | 88.6(2)                  |
|                             | S <sub>0</sub> | 91.0         | -          | 92.2         | 86.0          | 87.0                     |
|                             | T <sub>1</sub> | 91.8         | -          | 92.9         | 86.5          | 87.8                     |
| <b>P2-Pt1-X<sup>a</sup></b> | X-ray          | 87.61(7)     | 87.76(8)   | <sup>b</sup> | 90.62(11)     | 90.0(2)                  |
|                             | S <sub>0</sub> | 86.4         | -          | 88.1         | 91.0          | 90.8                     |
|                             | T <sub>1</sub> | 87.1         | -          | 88.7         | 91.7          | 92.4                     |
| <b>P1-Pt1-P2</b>            | X-ray          | 174.74(8)    | 175.00(7)  | 176.8(3)     | 177.17(5)     | 173.83(8)                |
|                             | S <sub>0</sub> | 177.5        | -          | 178.6        | 176.9         | 176.8                    |
|                             | T <sub>1</sub> | 178.6        | -          | 178.4        | 178.0         | 175.0                    |
| <b>C1-Pt1-X<sup>a</sup></b> | X-ray          | 178.3(2)     | 179.0(2)   | 176.03(8)    | 175.77(17)    | 178.2(4) <sup>c</sup>    |
|                             | S <sub>0</sub> | 178.3        | -          | 178.8        | 179.7         | 179.2                    |
|                             | T <sub>1</sub> | 178.1        | -          | 178.2        | 179.7         | 178.1                    |

<sup>a</sup>X represents here the atom of the anionic ligand in *trans*-position to the dye bond to the Pt ion. <sup>b</sup>The molecule has a mirror plane which is defined by the plane of the dye's inner heterocycle. <sup>c</sup>Cl remained isotropic and could not further be refined.

## Photophysical properties

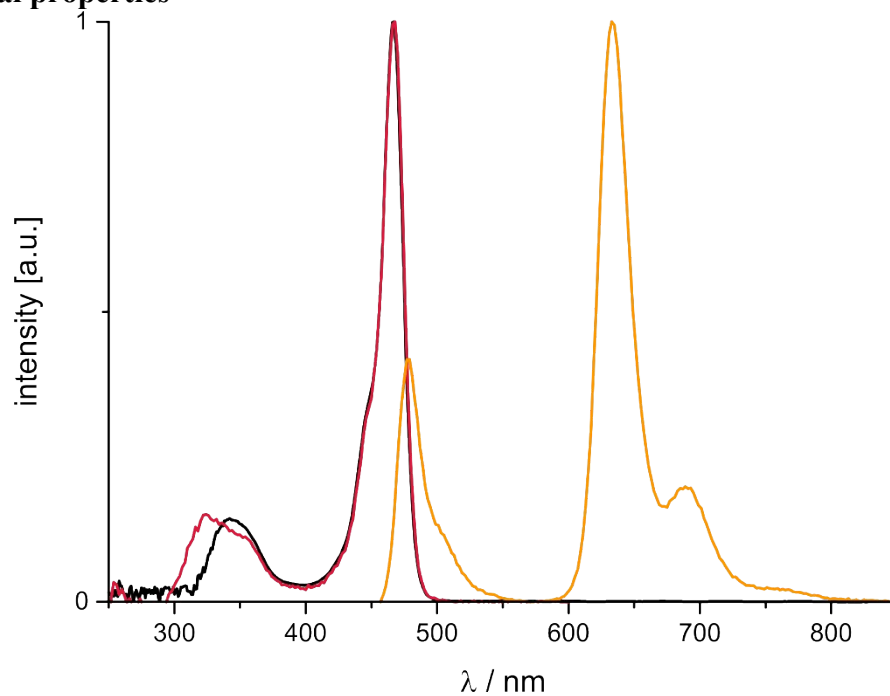

**Figure S29:** UV-Vis absorption (black), excitation (detection at 635 nm, red) and emission spectra (orange, excited at 450 nm) of **Pt-Cl** in a ca. 10<sup>-6</sup> M CH<sub>2</sub>Cl<sub>2</sub> solution at r.t.

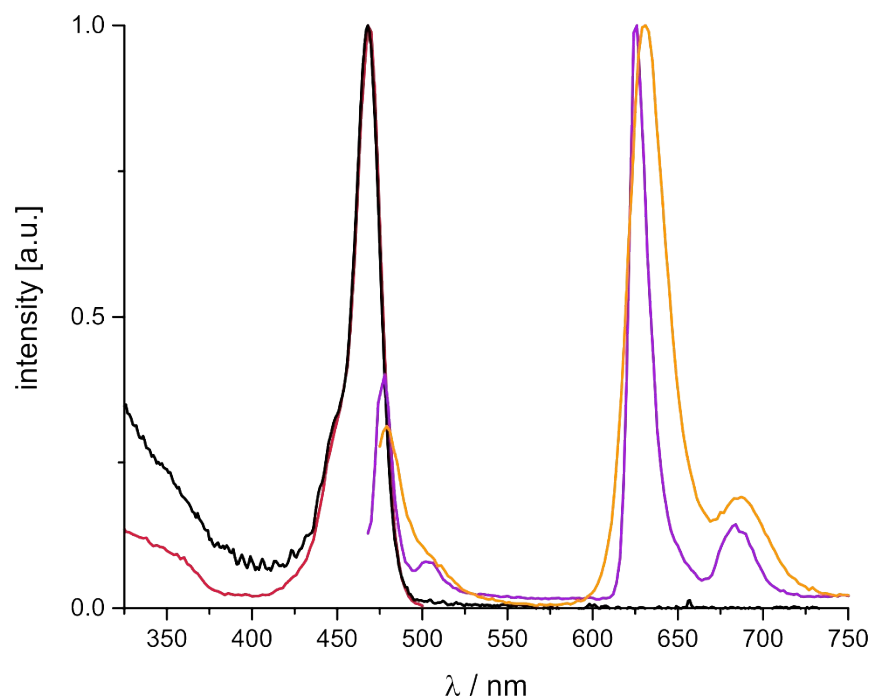

**Figure S30:** UV-Vis absorption (black), excitation (detection at 635 nm, r.t., red) and emission spectra (orange, r.t., excited at 468 nm; violet, 77 K, excited at 450 nm) of **Pt-Cl** in a ca. 10<sup>-6</sup> M toluene solution.

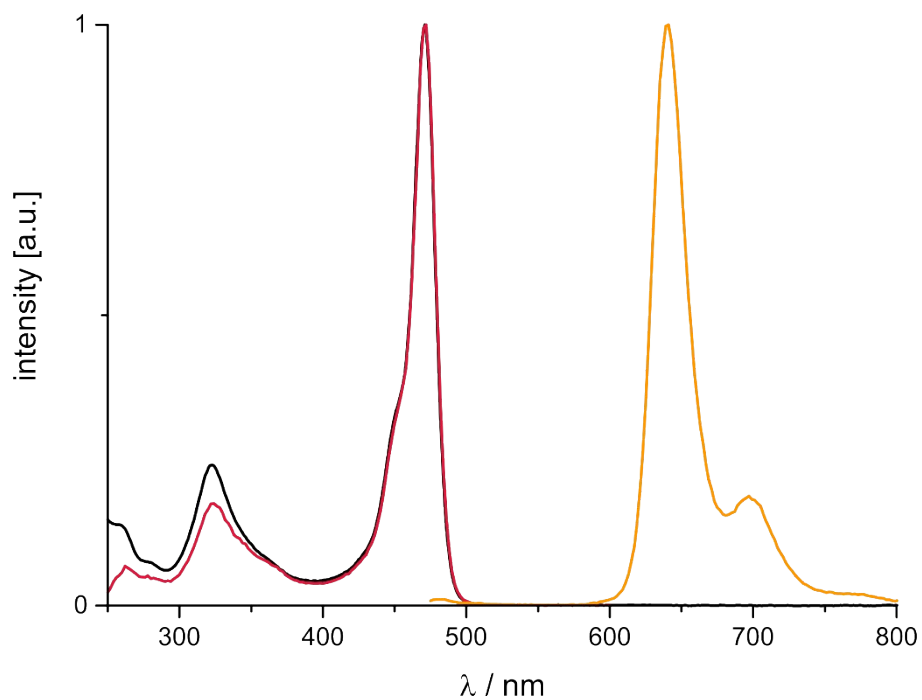

**Figure S31:** UV-Vis absorption (black), excitation (detection at 640 nm, red) and emission spectra (orange, excited at 471 nm) of **Pt-I** in a ca.  $10^{-6}$  M  $\text{CH}_2\text{Cl}_2$  solution at r.t.

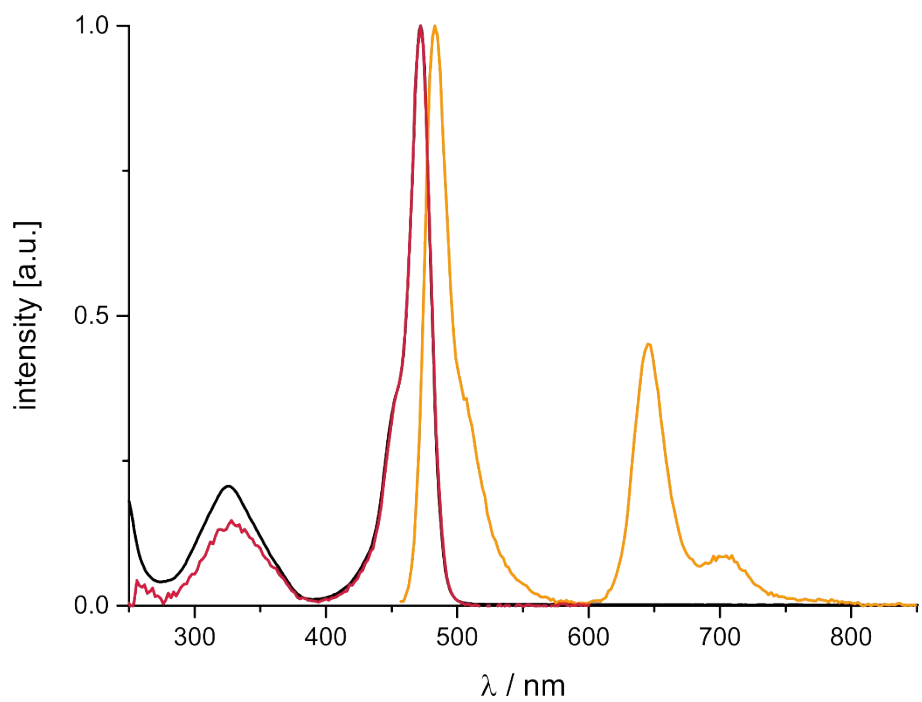

**Figure S32:** UV-Vis absorption (black), excitation (detection at 646 nm, red) and emission spectra (orange, excited at 450 nm) of **Pt-NO<sub>2</sub>** in a ca.  $10^{-6}$  M  $\text{CH}_2\text{Cl}_2$  solution at r.t.

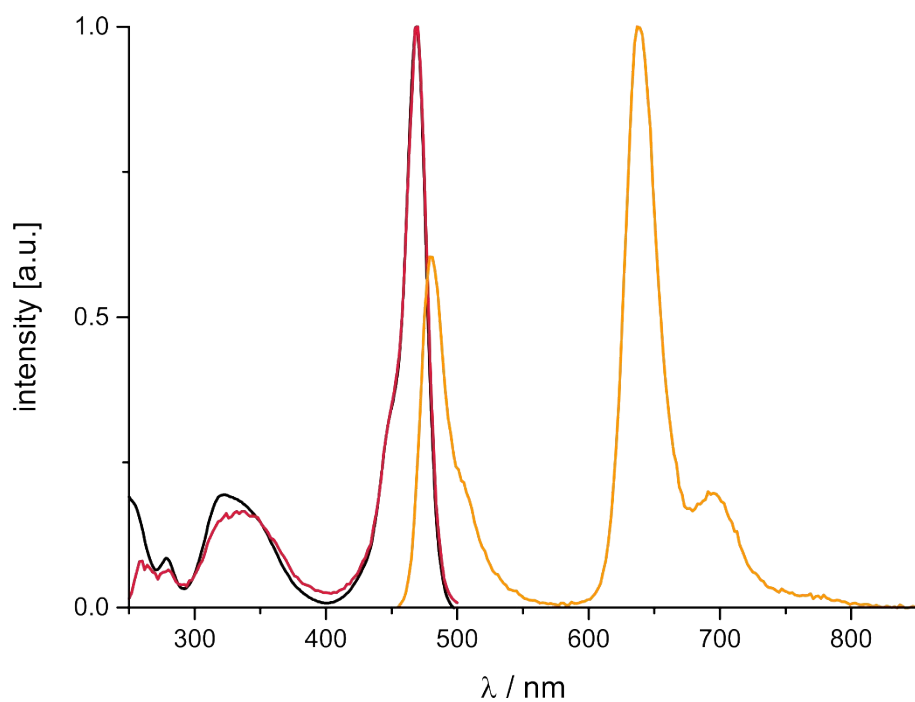

**Figure S33:** UV-Vis absorption (black), excitation (detection at 638 nm, red) and emission spectra (orange, excited at 450 nm) of **Pt-NCS** in a ca.  $10^{-6}$  M  $\text{CH}_2\text{Cl}_2$  solution at r.t.

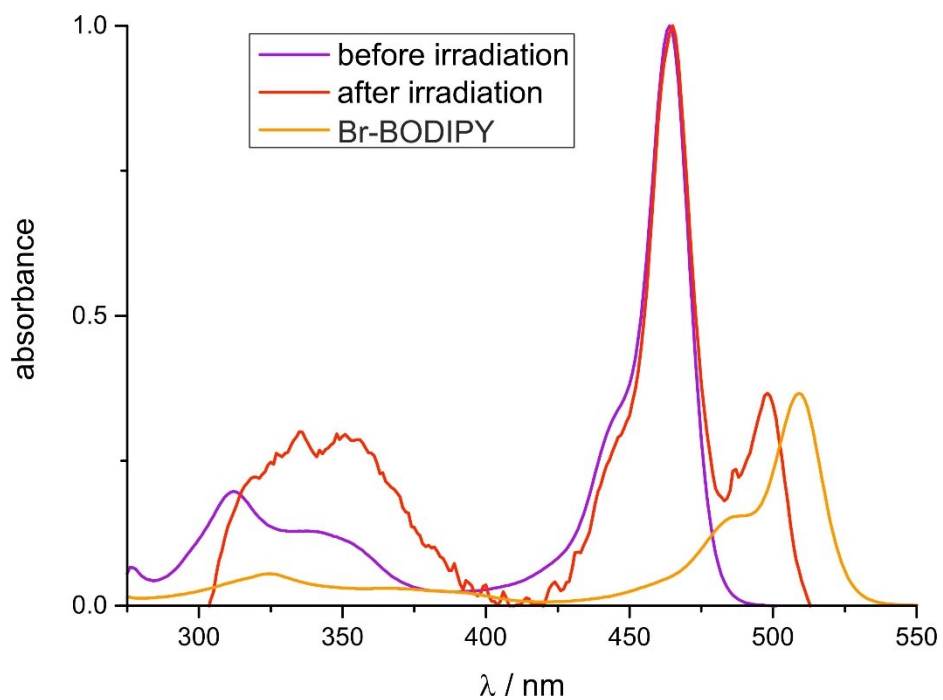

**Figure S34:** Electronic absorption spectra of **Pt-CH<sub>3</sub>** in a ca.  $10^{-6}$  M benzene solution before and after irradiating the sample into its lowest energy absorption band, and of **Br-BODIPY** in benzene solution, respectively.

## Stern-Volmer quenching experiments

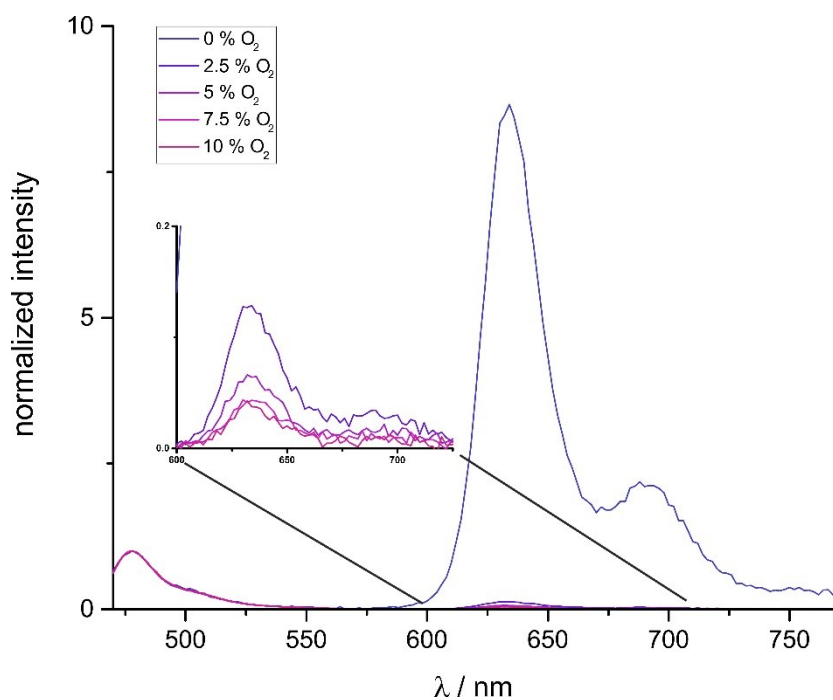

Figure S35: Stacked luminescence spectra of Pt-Cl at different oxygen concentrations.

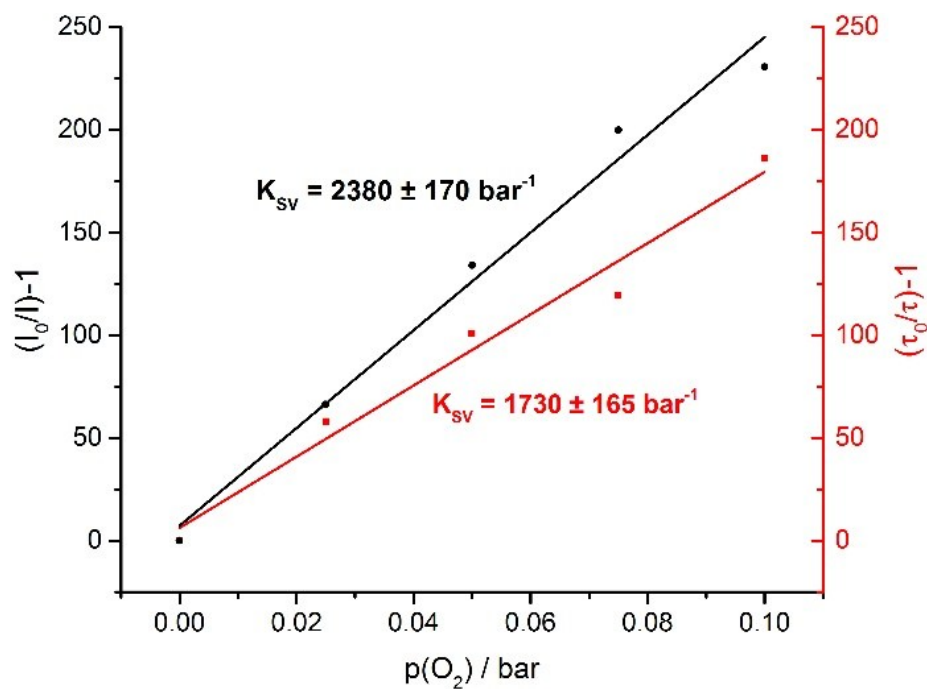

Figure S36: Stern-Volmer plot of Pt-Cl.

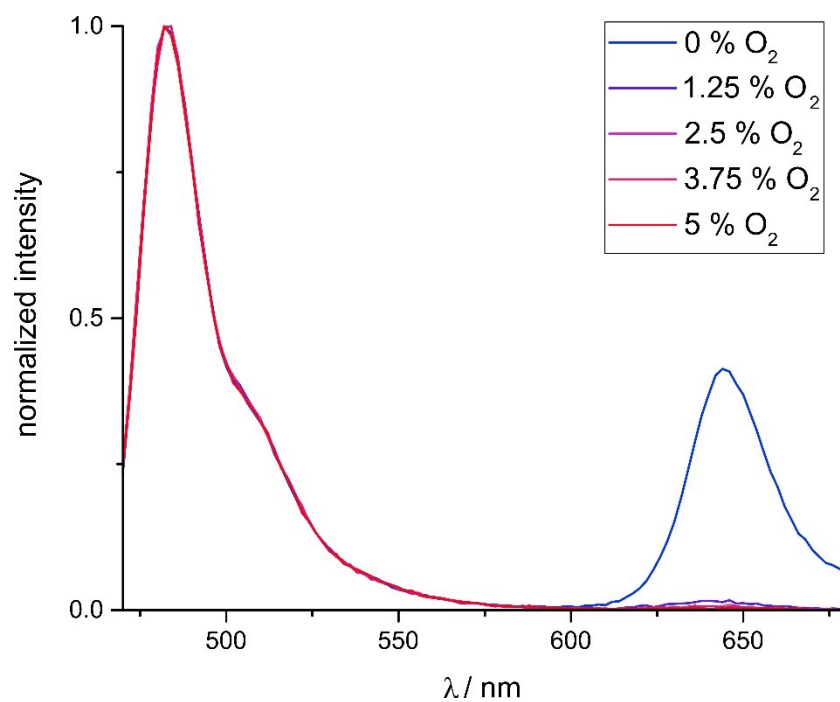

Figure S37: Stacked luminescence spectra of Pt-NO<sub>2</sub> in CH<sub>2</sub>Cl<sub>2</sub> solution at different oxygen concentration levels.

### Photoreaction

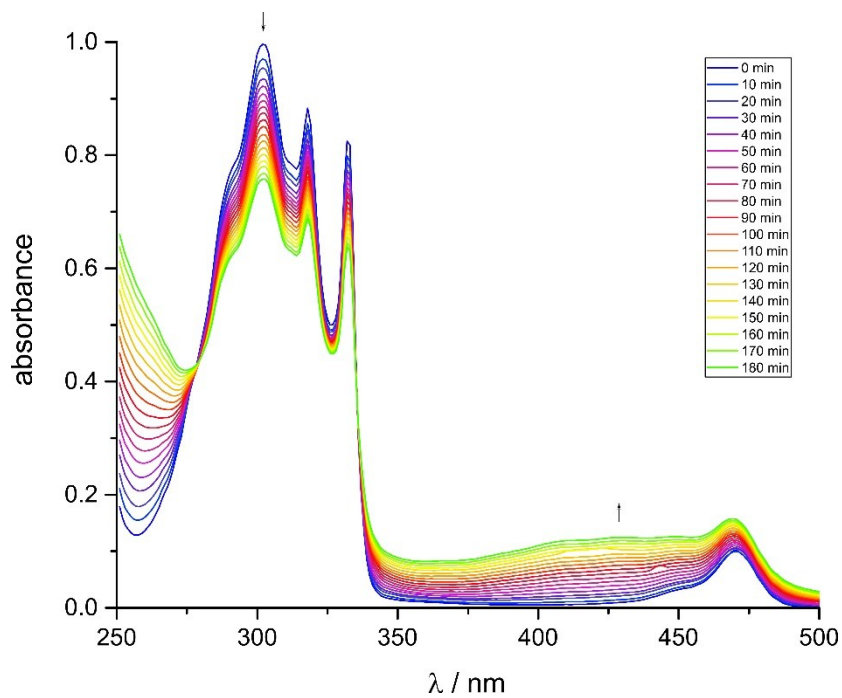

Figure S38: Spectral change in the absorption spectra of the reaction mixture containing DHN and Pt-I.



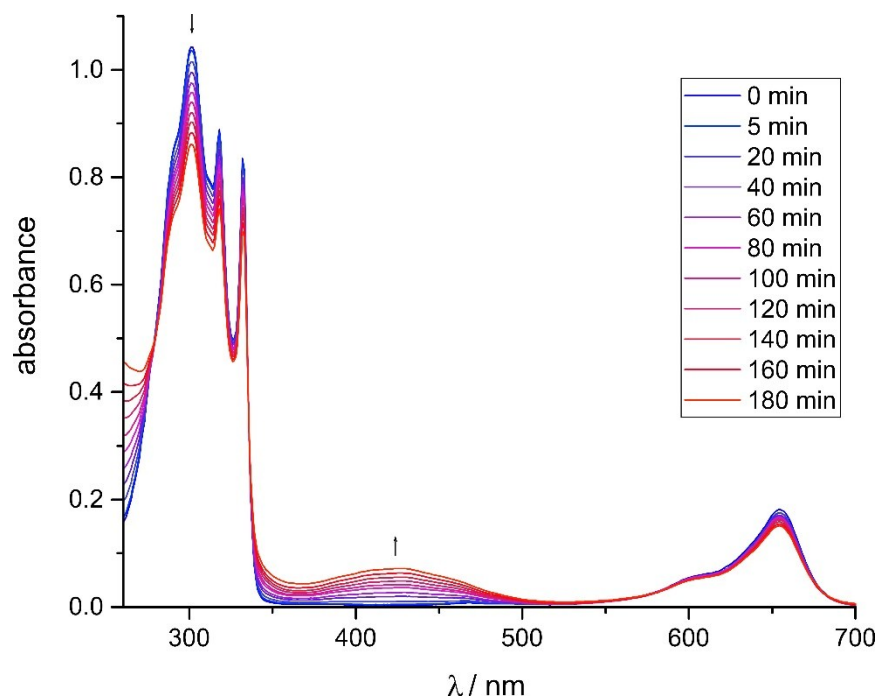

Figure S39: Spectral change in the absorption spectra of the reaction mixture containing **DHN** and the reference sensitizer **MB**.

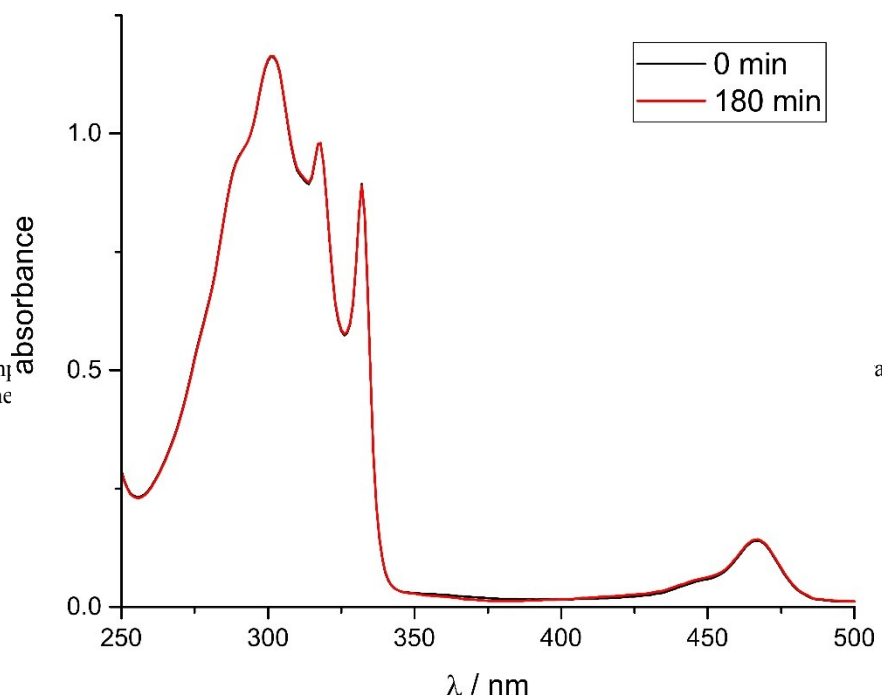

Figure S40: Same as Figure S39, but the spectra were taken before and after that time

were taken before

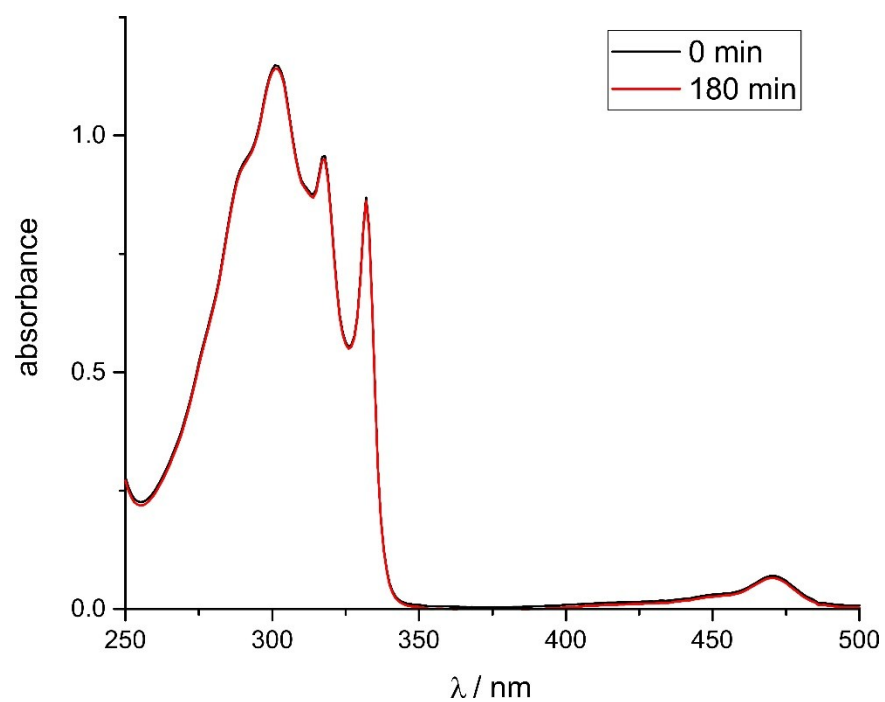

**Figure S41:** Sample of the reaction mixture of **DHN** and **Pt-I** kept in the dark for 180 min; UV-Vis spectra were taken before and after that time period.
